# Supplementary material for: Di-mannosylation enhances the adjuvant properties of adamantane-containing desmuramyl peptides in vivo
Source: Royal Society of Chemistry journal article supplement (doi:10.1039/d4ob00592a), 2024-01-01
Supplement: d4ob00592a1.pdf [file d4ob00592a1.pdf]

## Supplementary Information

### **Synthesis and evaluation of immunomodulating properties of the mono- and dimannosylated adamantane-containing desmuramyl dipeptides**

Marija Paurević,<sup>a</sup> Aleksandra Maršavelski,<sup>b</sup> Siniša Ivanković,<sup>c</sup> Ranko Stojković<sup>c</sup> and Rosana Ribić\*<sup>d</sup>

‡To whom correspondence should be addressed: Tel: +358 42 493 306; e-mail: [rosana.ribic@unin.hr](mailto:rosana.ribic@unin.hr)

**Table S1.** Gibbs energy of binding of mono-mannosylated compound 7

| $E_{VDWAALS}/$<br>$kcalmol^{-1}$      | $E_{el}/$<br>$kcalmol^{-1}$ | $E_{GB}/$<br>$kcalmol^{-1}$ | $E_{surf}/$<br>$kcalmol^{-1}$ | $\Delta H_{gas}/$<br>$kcalmol^{-1}$ | $\Delta H_{solv}/$<br>$kcalmol^{-1}$ | $\Delta H_{bind} + \text{Std. Err. of Mean}/$<br>$kcalmol^{-1}$ | $T\Delta S / kcalmol^{-1}$ | $\Delta G_{bind} / kcalmol^{-1}$ |
|---------------------------------------|-----------------------------|-----------------------------|-------------------------------|-------------------------------------|--------------------------------------|-----------------------------------------------------------------|----------------------------|----------------------------------|
| <b>Complex compound 7 – pocket 1</b>  |                             |                             |                               |                                     |                                      |                                                                 |                            |                                  |
| -65.0                                 | 15.3                        | 6.7                         | -9.3                          | -49.7                               | -2.6                                 | -52.3±0.5                                                       | -26.6± 2.5                 | <b>-25.7</b>                     |
| -65.4                                 | 22.7                        | 0.3                         | -8.6                          | -42.7                               | -8.3                                 | -51.0±0.3                                                       | -27.7±2.2                  | <b>-23.3</b>                     |
| -68.4                                 | 12.3                        | 9.4                         | -9.3                          | -56.1                               | 0.1                                  | -56.0±0.4                                                       | -27.9± 2.3                 | <b>-28.1</b>                     |
| <b>average</b>                        |                             |                             |                               |                                     |                                      |                                                                 |                            | <b>-25.7</b>                     |
| <b>Complex compound 7 – pocket 2a</b> |                             |                             |                               |                                     |                                      |                                                                 |                            |                                  |
| -37.7                                 | 56.5                        | -41.7                       | -5.4                          | 18.8                                | -47.1                                | -28.3±0.3                                                       | -28.1± 1.4                 | <b>-0.2</b>                      |
| -33.1                                 | 57.3                        | -47.5                       | -5.3                          | 24.2                                | -52.8                                | -28.6±0.3                                                       | -28.5±3.4                  | <b>-0.1</b>                      |
| -43.7                                 | 60.1                        | -44.9                       | -6.0                          | 16.5                                | -50.9                                | -34.5±0.6                                                       | -33.4±1.9                  | <b>-1.1</b>                      |
| <b>average</b>                        |                             |                             |                               |                                     |                                      |                                                                 |                            | <b>-0.4</b>                      |
| <b>Complex compound 7 – pocket 2b</b> |                             |                             |                               |                                     |                                      |                                                                 |                            |                                  |
| -32.7                                 | -61.0                       | 72.8                        | -5.1                          | -93.7                               | 67.7                                 | -26.0±0.4                                                       | -27.7± 2.3                 | <b>1.8</b>                       |
| -32.1                                 | -49.9                       | 63.4                        | -5.8                          | -81.9                               | 57.6                                 | -24.3 ±3.2                                                      | -27.0±3.3                  | <b>2.7</b>                       |
| -38.2                                 | -43.3                       | 62.3                        | -5.0                          | -81.4                               | 57.3                                 | -24.1±1.0                                                       | -27.0±4.2                  | <b>2.9</b>                       |
| <b>average</b>                        |                             |                             |                               |                                     |                                      |                                                                 |                            | <b>2.4</b>                       |

**Table S2.** Gibbs energy of binding of di-mannosylated compound **11**

| $E_{VDWAALS}/$<br>$kcalmol^{-1}$       | $E_{el}/$<br>$kcalmol^{-1}$ | $EGB /$<br>$kcalmol^{-1}$ | $E_{surf}/$<br>$kcalmol^{-1}$ | $\Delta H_{gas}/$<br>$kcalmol^{-1}$ | $\Delta H_{solv}/$<br>$kcalmol^{-1}$ | $\Delta H_{bind} + \text{Std. Err. of Mean} /$<br>$kcalmol^{-1}$ | $T\Delta S / kcalmol^{-1}$ | $\Delta G_{bind} / kcalmol^{-1}$ |
|----------------------------------------|-----------------------------|---------------------------|-------------------------------|-------------------------------------|--------------------------------------|------------------------------------------------------------------|----------------------------|----------------------------------|
| <b>Complex compound 11 – pocket 1</b>  |                             |                           |                               |                                     |                                      |                                                                  |                            |                                  |
| -108.1                                 | -3.6                        | 48.8                      | -14.4                         | -111.7                              | 34.3                                 | $-77.7 \pm 0.4$                                                  | $-43.7 \pm 2.6$            | <b>-33.6</b>                     |
| -100.4                                 | -26.3                       | 60.5                      | -13.6                         | -126.7                              | 46.9                                 | $-79.7 \pm 0.3$                                                  | $-42.9 \pm 2.7$            | <b>-36.8</b>                     |
| -96.1                                  | -20.8                       | 45.5                      | -13.5                         | -116.9                              | 32.0                                 | $-84.9 \pm 0.3$                                                  | $-47.3 \pm 2.7$            | <b>-37.6</b>                     |
| <b>average</b>                         |                             |                           |                               |                                     |                                      |                                                                  |                            | <b>-36.0</b>                     |
| <b>Complex compound 11 – pocket 2a</b> |                             |                           |                               |                                     |                                      |                                                                  |                            |                                  |
| -65.6                                  | -46.9                       | 64.1                      | -9.8                          | -112.5                              | 54.3                                 | $-58.8 \pm 0.7$                                                  | $-39.7 \pm 2.9$            | <b>-18.5</b>                     |
| -64.1                                  | -11.5                       | 29.6                      | -8.8                          | -75.7                               | 20.8                                 | $-54.9 \pm 0.3$                                                  | $-38.7 \pm 2.1$            | <b>-16.2</b>                     |
| -64.7                                  | -12.5                       | 31.3                      | -9.6                          | -77.2                               | 21.7                                 | $-55.5 \pm 0.4$                                                  | $-35.6 \pm 2.5$            | <b>-19.9</b>                     |
| <b>average</b>                         |                             |                           |                               |                                     |                                      |                                                                  |                            | <b>-18.2</b>                     |
| <b>Complex compound 11 – pocket 2b</b> |                             |                           |                               |                                     |                                      |                                                                  |                            |                                  |
| -63.1                                  | 16.6                        | 7.4                       | -8.8                          | -46.6                               | -1.4                                 | $-48.0 \pm 0.5$                                                  | $-32.9 \pm 1.5$            | <b>-15.0</b>                     |
| -67.5                                  | 10.1                        | 19.5                      | -9.5                          | -57.4                               | 10.0                                 | $-47.4 \pm 0.2$                                                  | $-34.9 \pm 2.9$            | <b>-12.5</b>                     |
| -65.9                                  | 19.8                        | 5.5                       | -9.1                          | -46.1                               | -3.6                                 | $-49.7 \pm 0.7$                                                  | $-31.9 \pm 2.5$            | <b>-17.8</b>                     |
| <b>average</b>                         |                             |                           |                               |                                     |                                      |                                                                  |                            | <b>-15.1</b>                     |

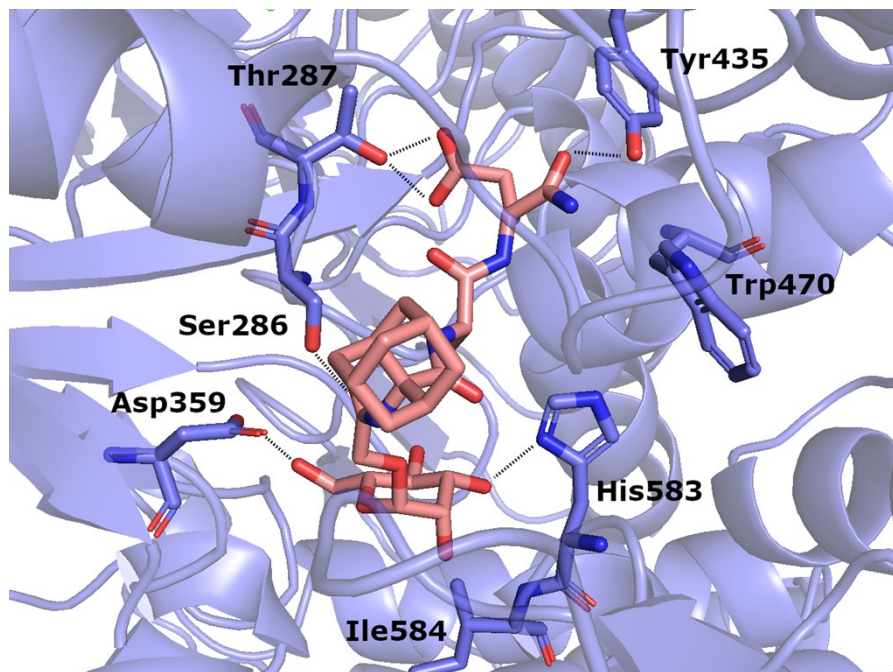

**Figure S1.** Mono-mannosylated compound 7 in binding pocket 1

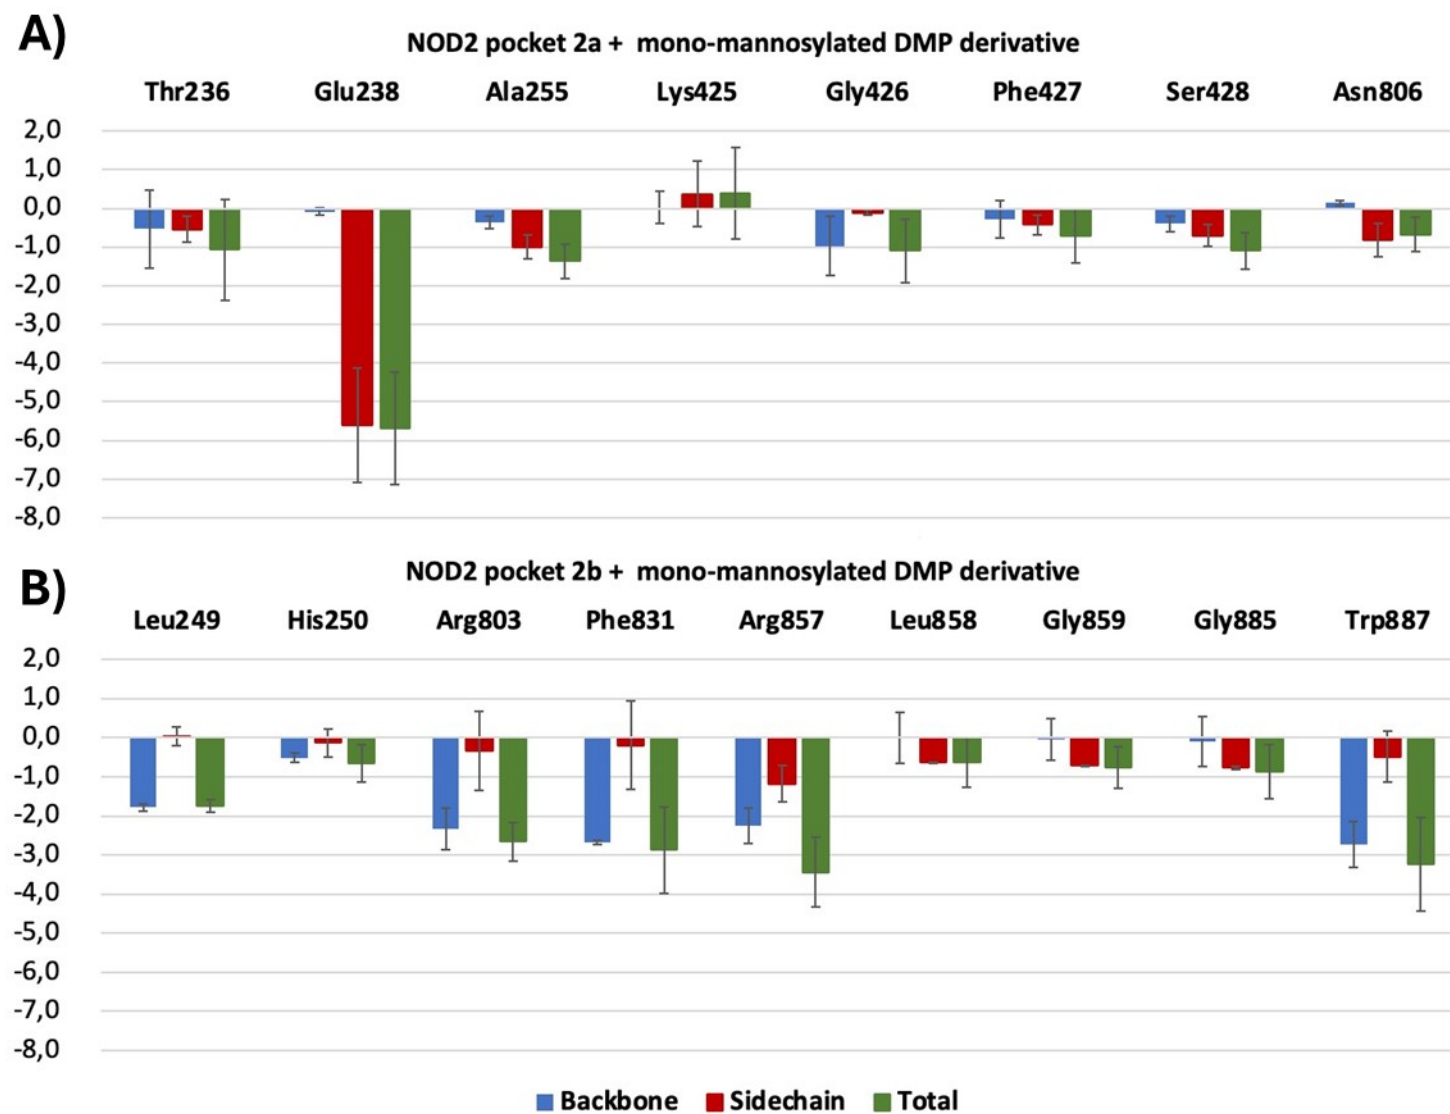

**Figure S2.** Per residue enthalpy decomposition for mono-mannosylated compound **7** in binding pocket 2a (A) and 2b (B) of NOD2

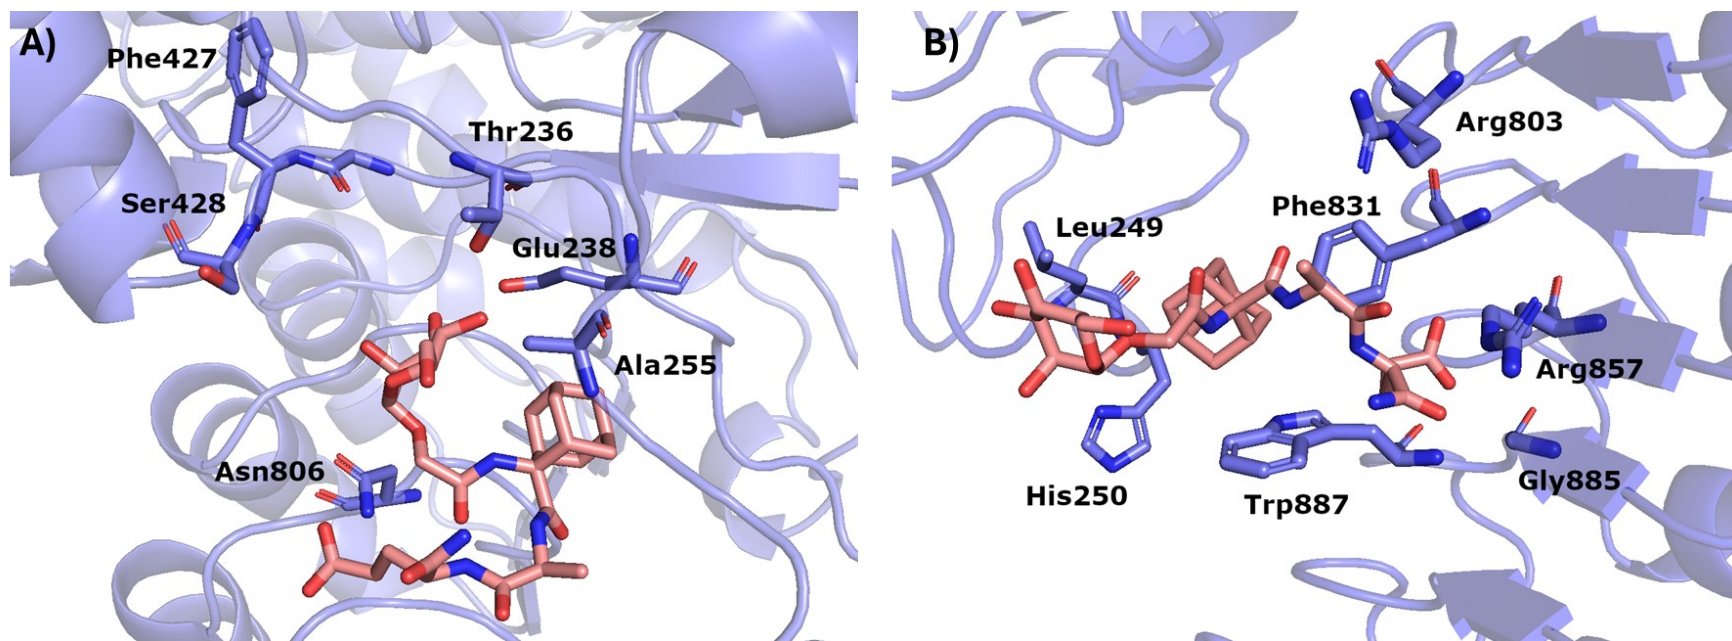

**Figure S3.** Mono-mannosylated compound **7** in binding pocket 2a (A) and pocket 2b (B) of NOD2

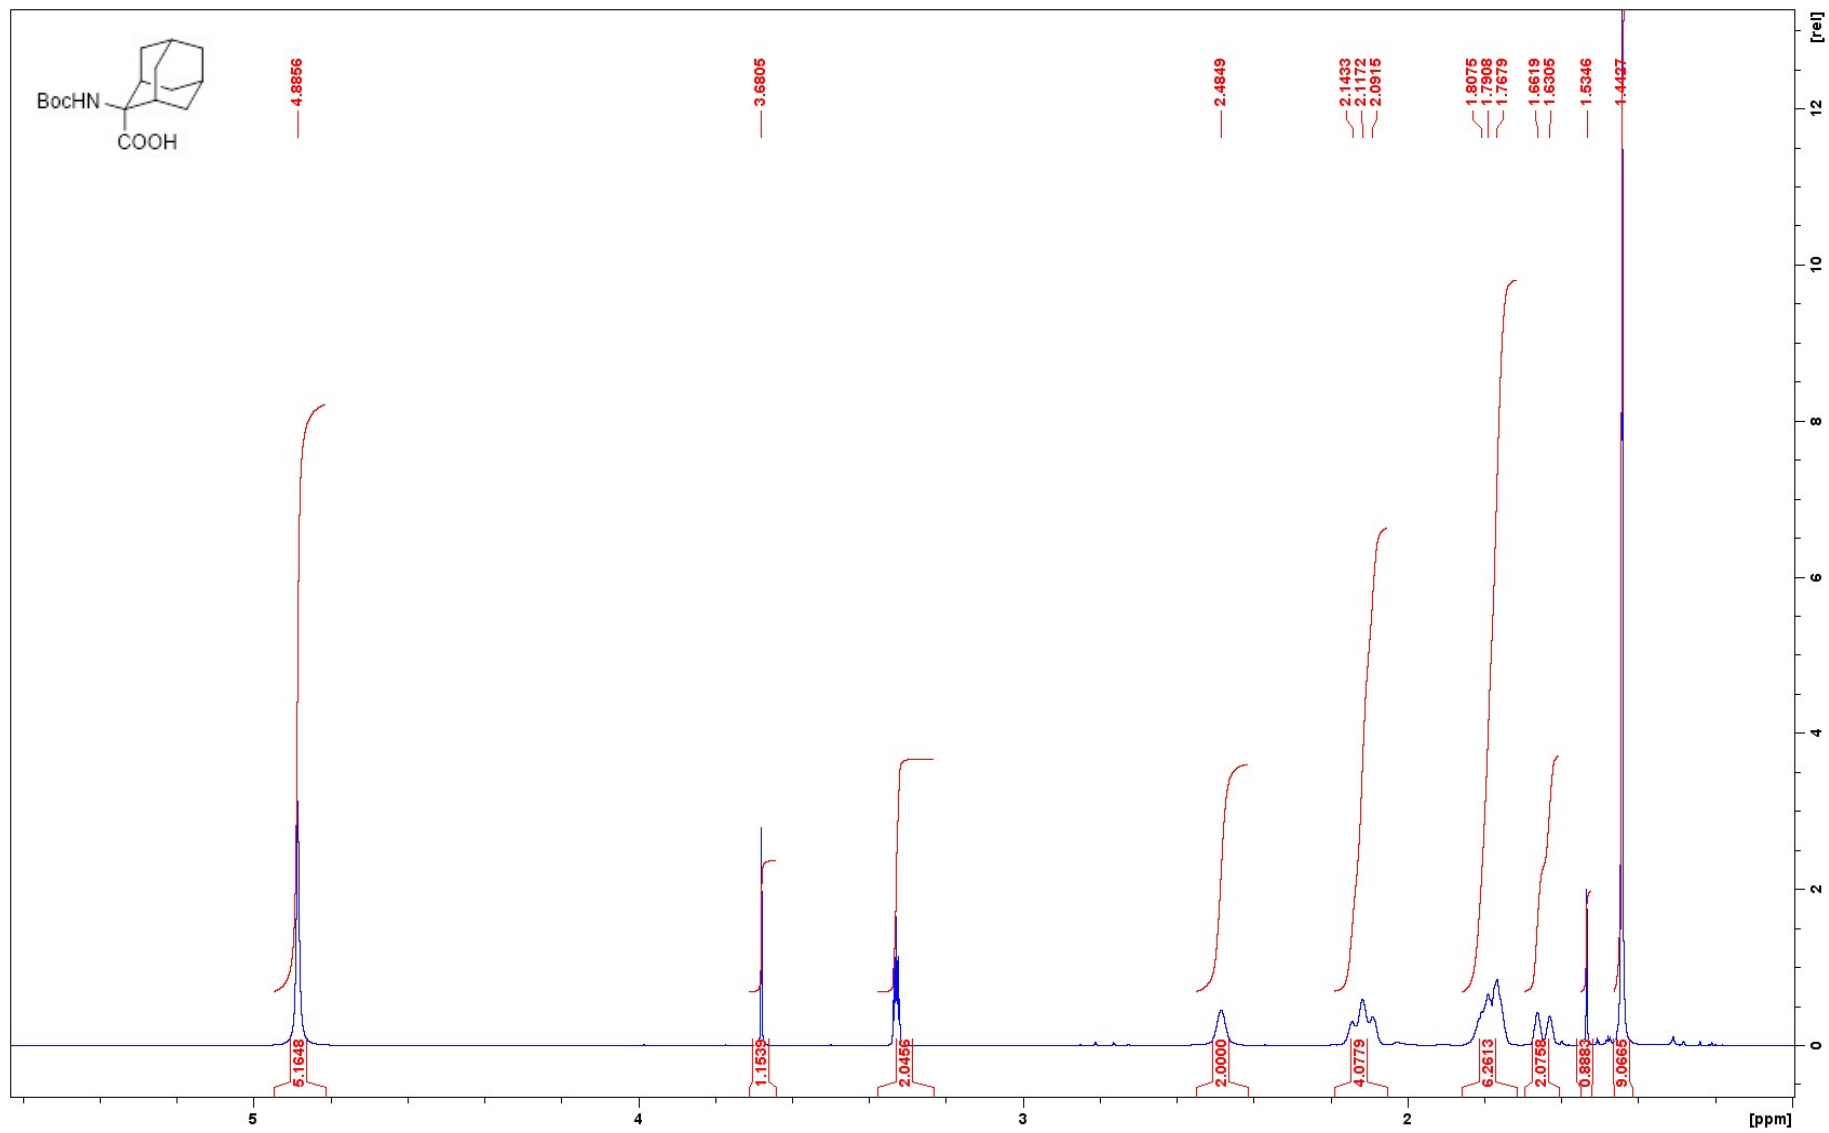

**Figure S4.** <sup>1</sup>H NMR spectrum of *N*-(*tert*-butoxycarbonyl)-2-aminoadamantane-2-carboxylic acid **1** (CD<sub>3</sub>OD, 400 MHz)

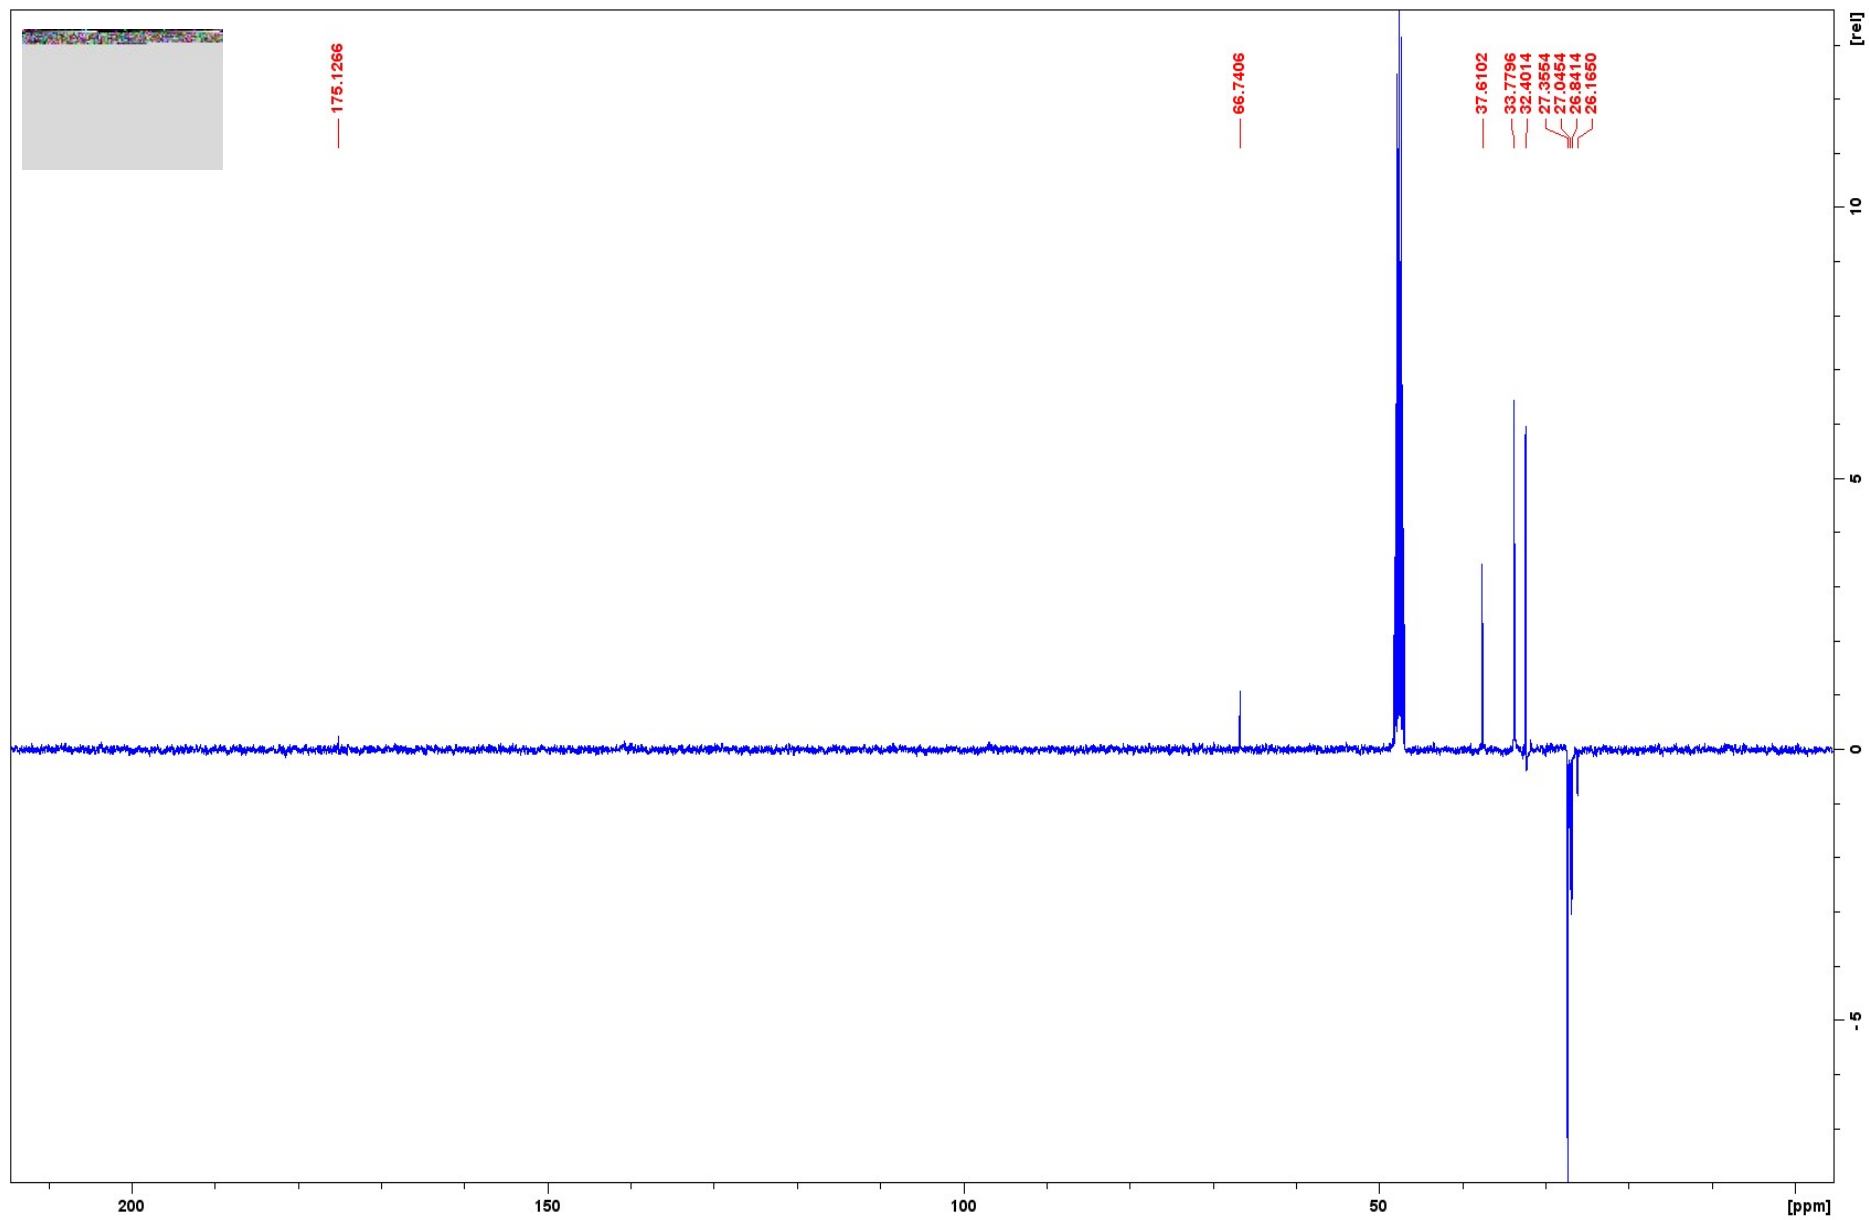

**Figure S5.**  $^{13}\text{C}$  NMR spectrum of *N*-(*tert*-butoxycarbonyl)-2-aminoadamantane-2-carboxylic acid **1** ( $\text{CD}_3\text{OD}$ , 100 MHz)



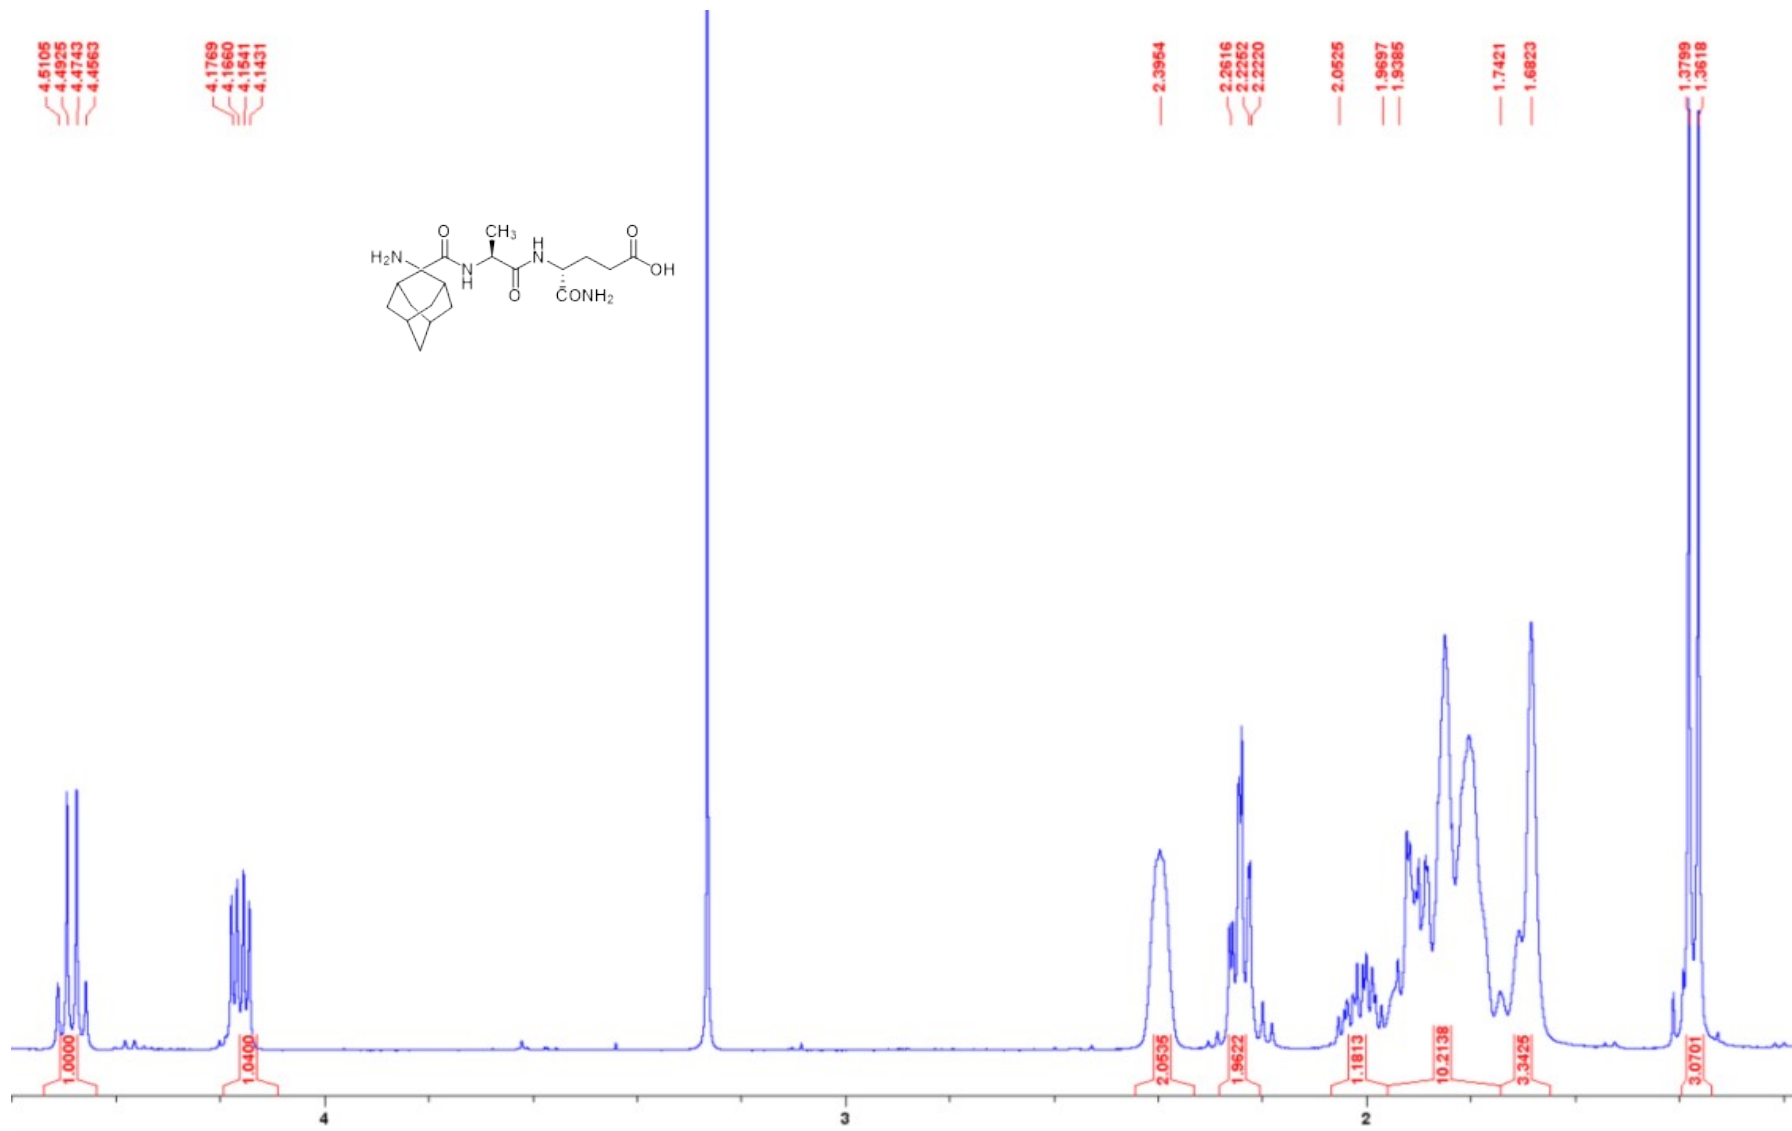

**Figure S6.** <sup>1</sup>H NMR spectrum of 4-{2-[(2-aminoadamantane-2-carbonyl)amino]propionylamino}-4-carbamoylbutanoic acid **4** (D<sub>2</sub>O, 400 MHz)

a)

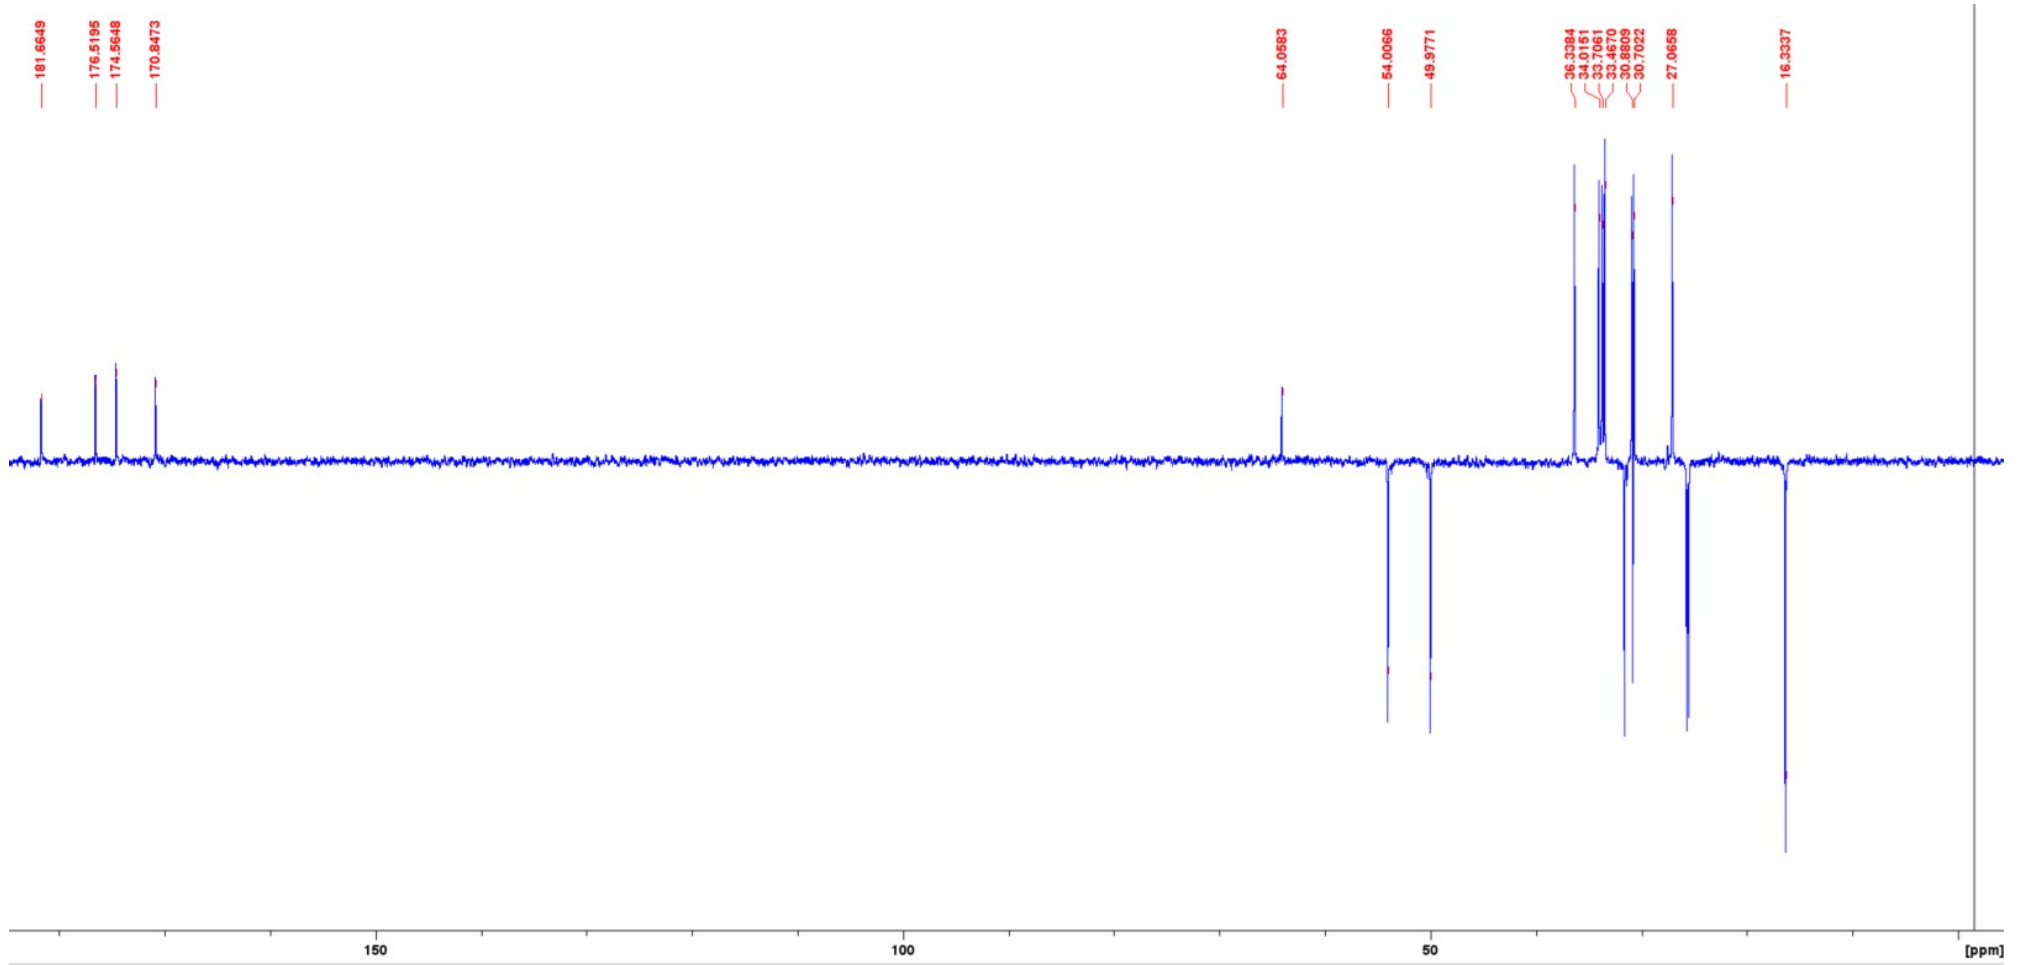

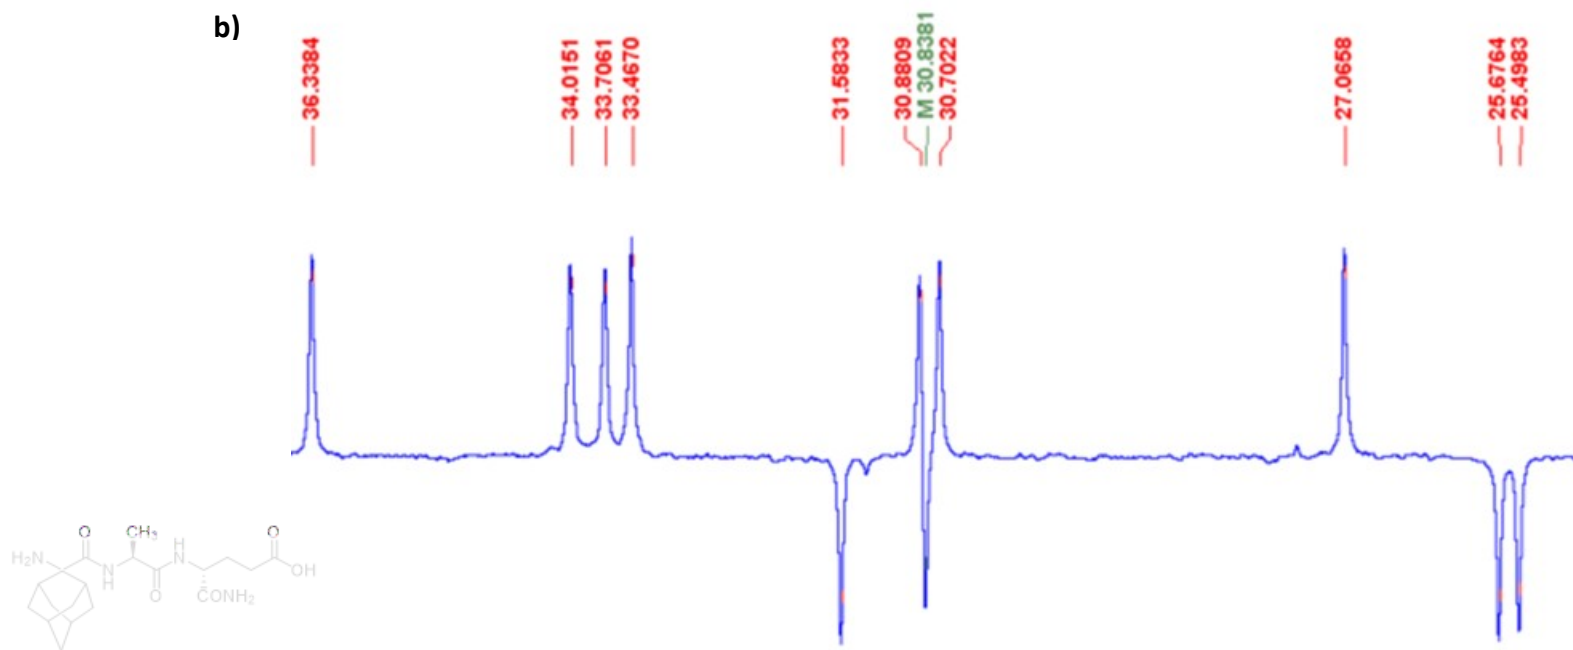

**Figure S7.**  $^{13}\text{C}$  NMR spectrum of 4-{2-[(2-aminoadamantane-2-carbonyl)amino]propionylamino}-4-carbamoylbutanoic acid **4** ( $\text{D}_2\text{O}$ , 100 MHz); a) full spectrum, b) enlarged region between 36.34 and 25.50 ppm.

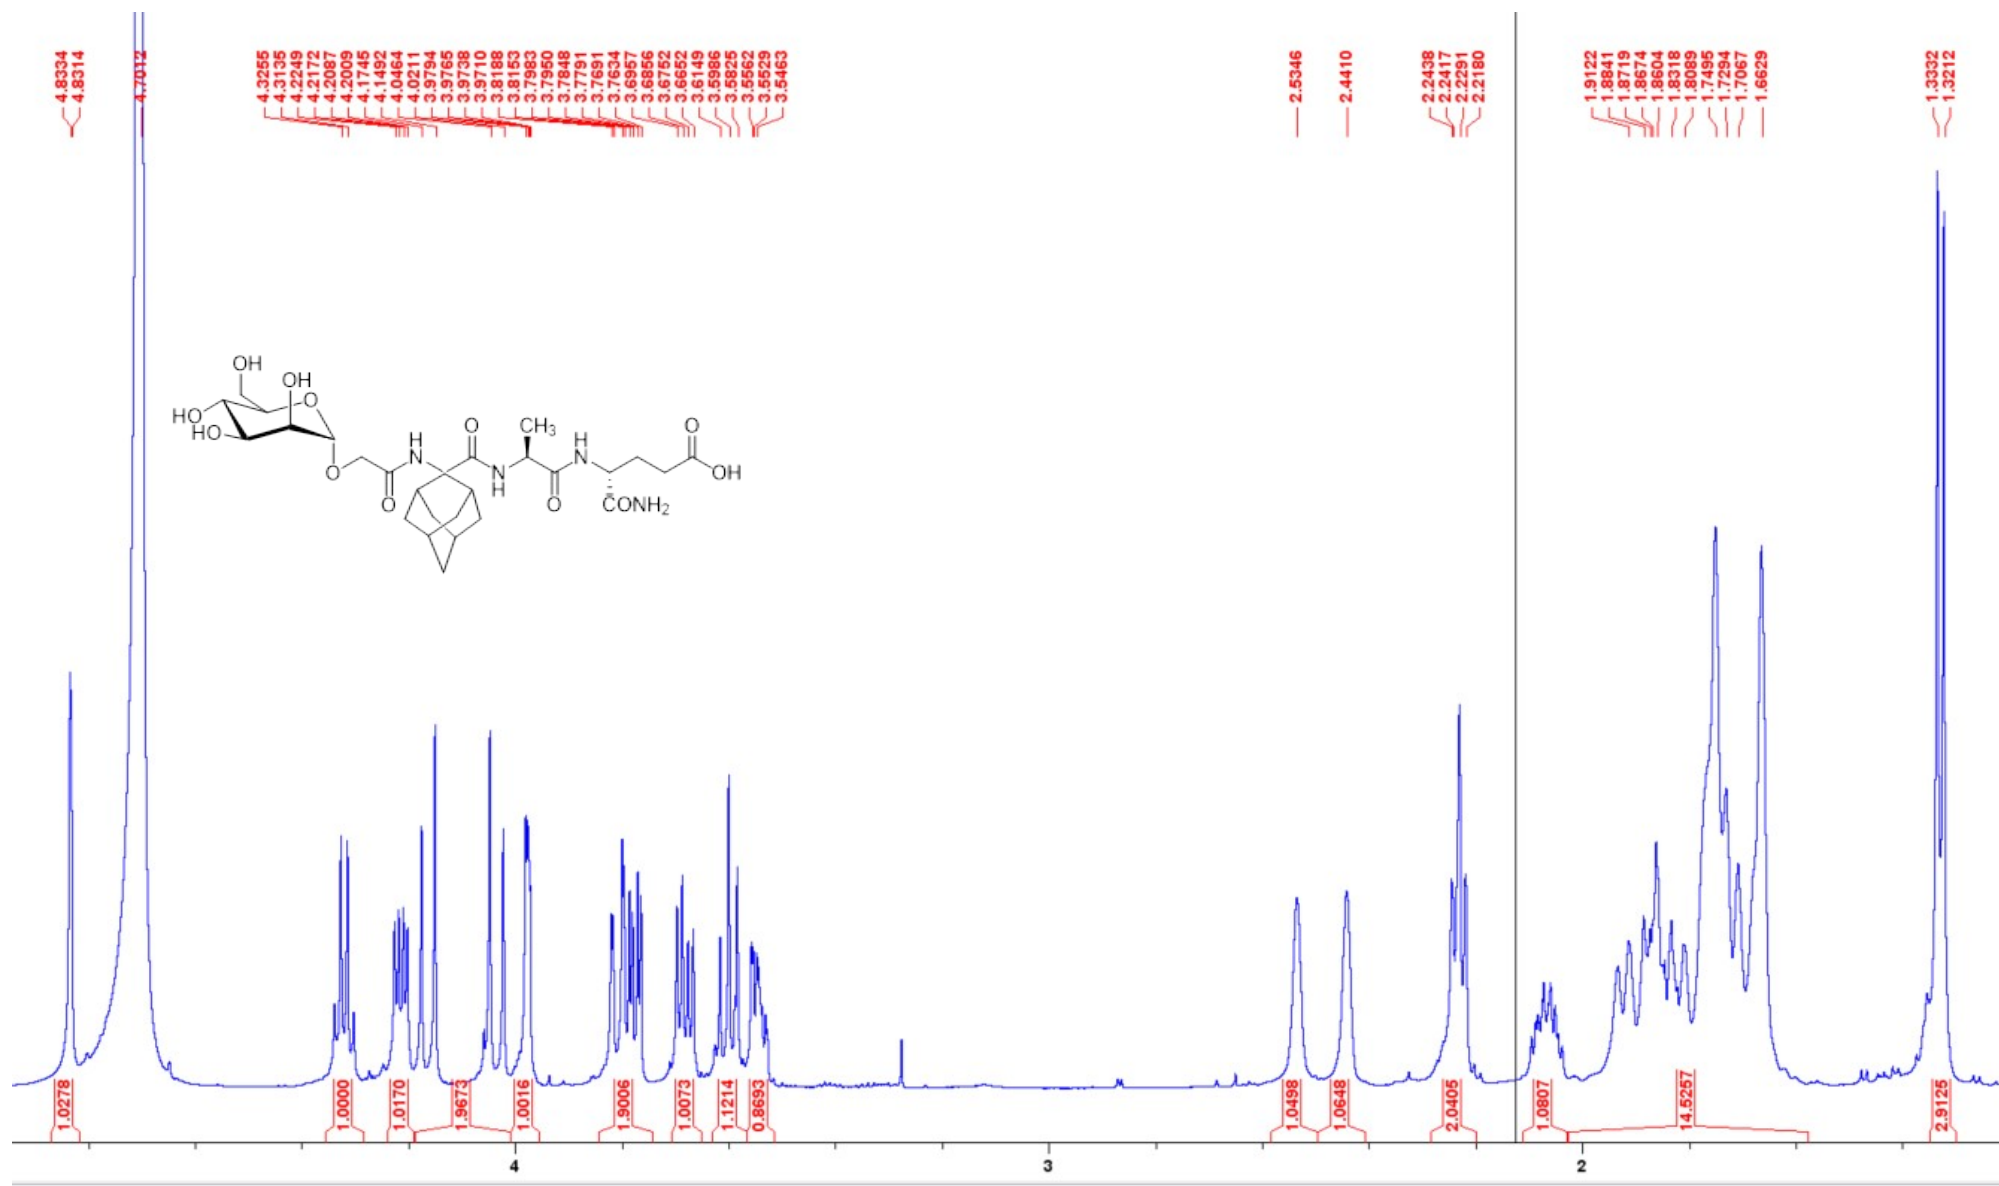

**Figure S8.**  $^1\text{H}$  NMR spectrum of 4-{2-[[2-( $\alpha$ -D-mannopyranosyloxy)ethanol]-amino]adamantane-2-carbonyl}amino-propionylamino-4-carbamoylbutanoic acid **7** ( $\text{D}_2\text{O}$ , 400 MHz)

a)

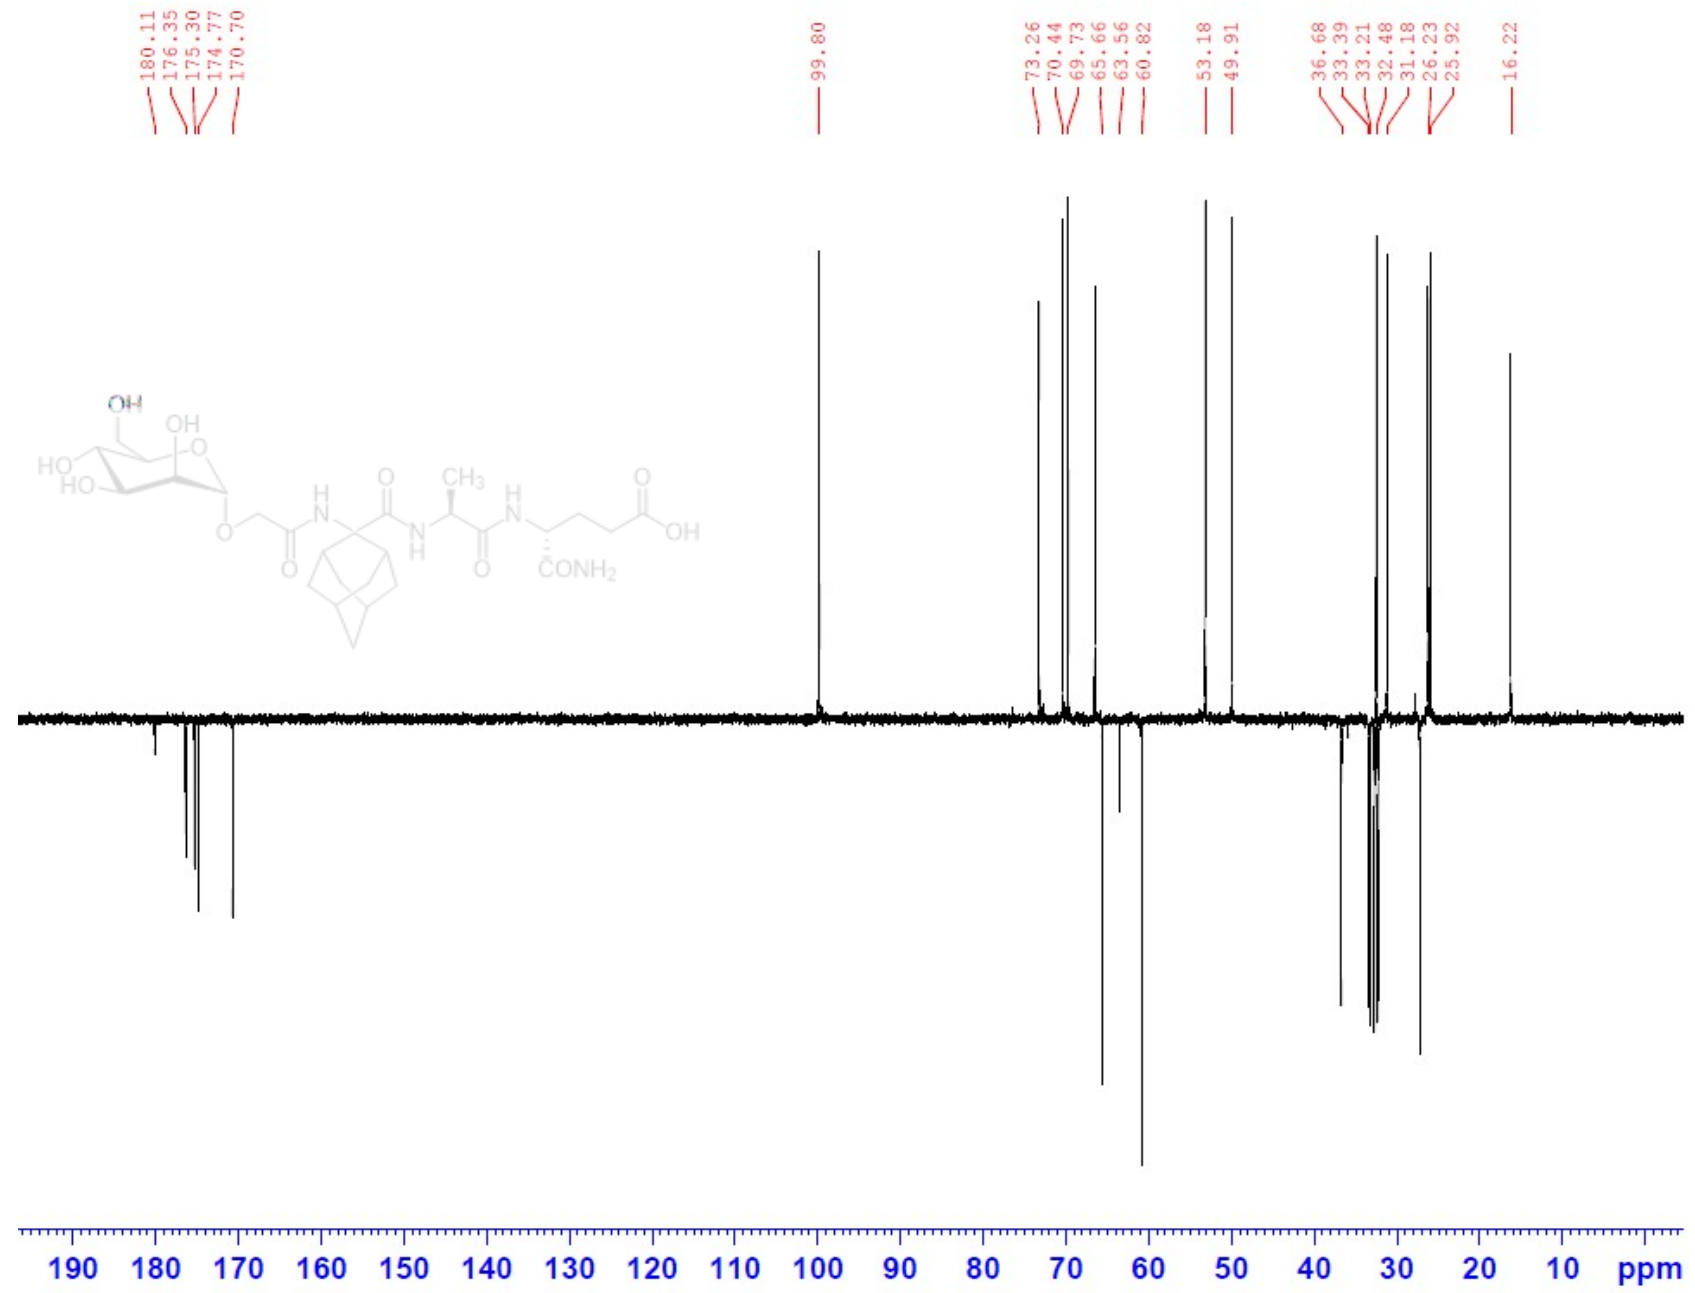

b)

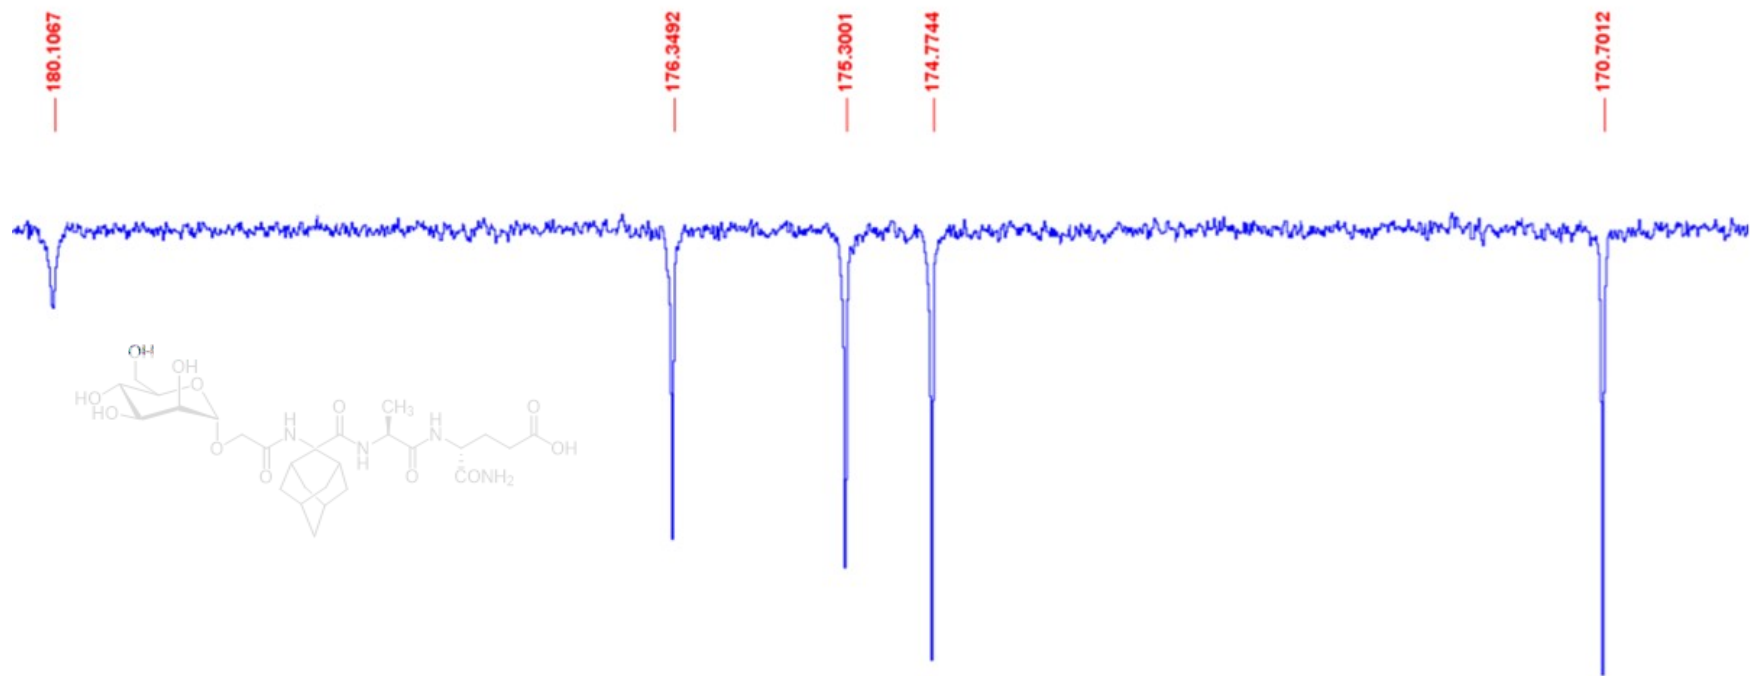

c)

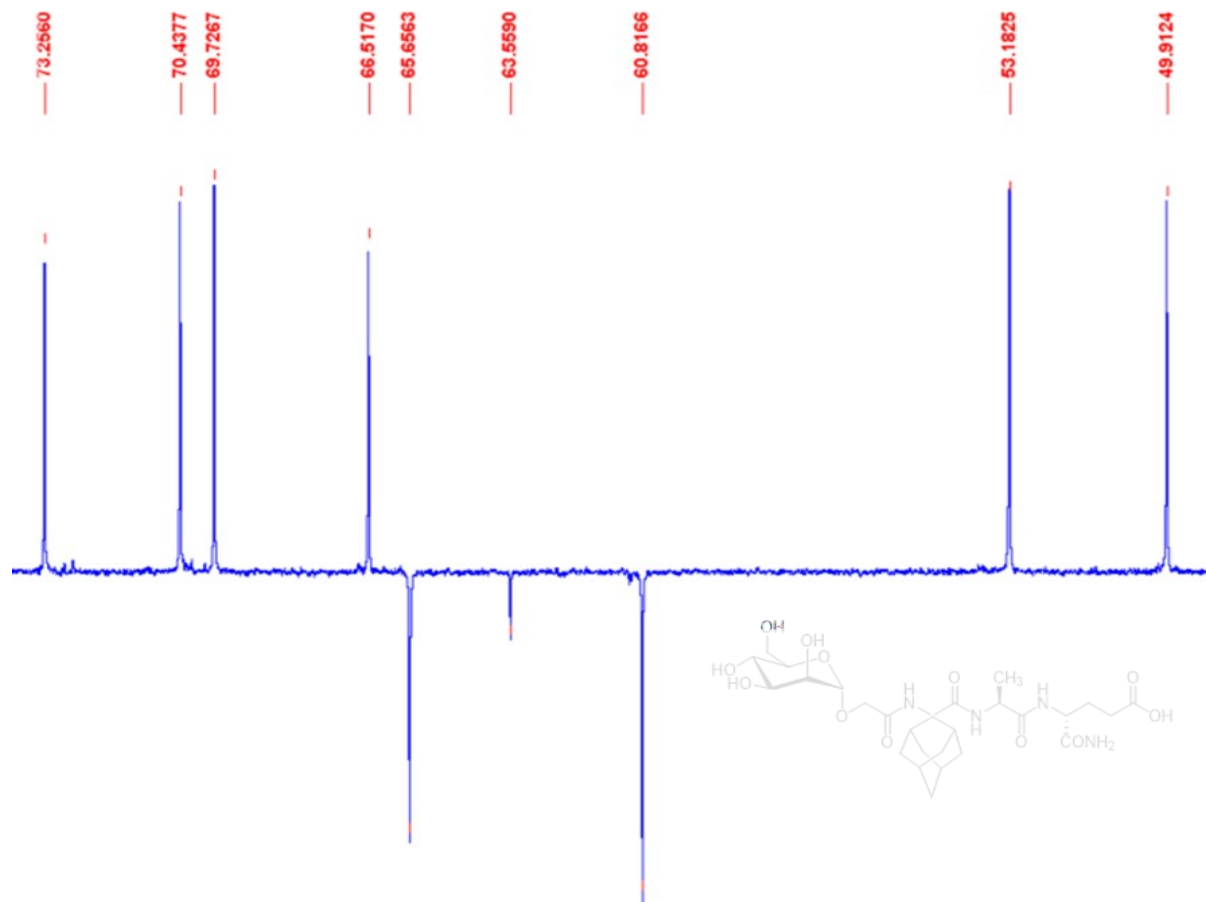

d)

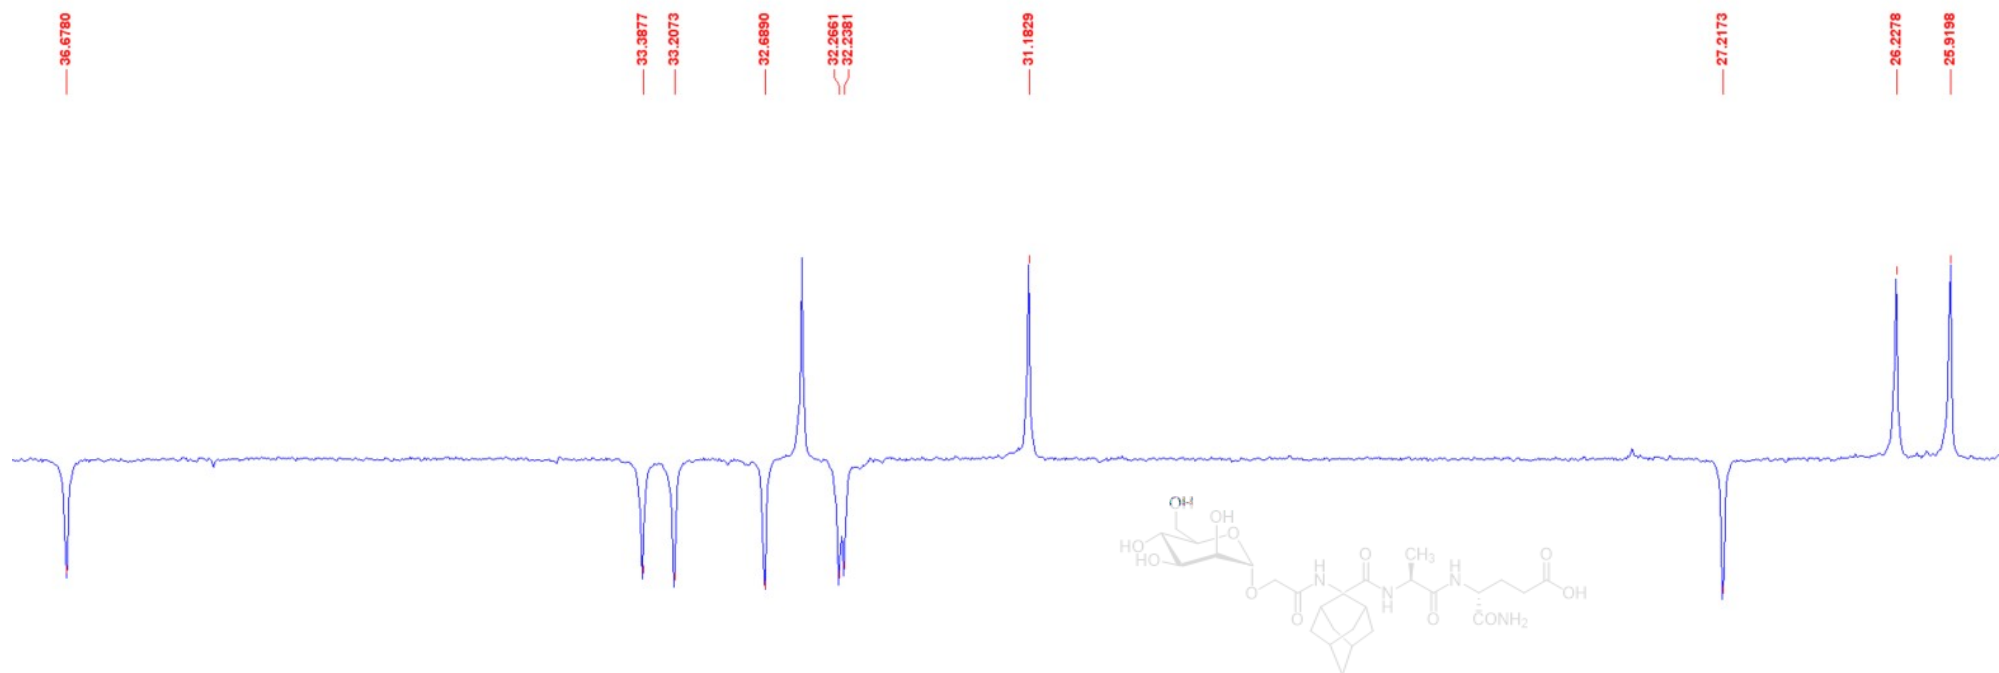

**Figure S9.**  $^{13}\text{C}$  NMR spectrum of 4-{2-[[2-( $\alpha$ -D-mannopyranosyloxy)ethanol]-aminoadamantane-2-carbonyl]amino}-propionylamino}-4-carbamoylbutanoic acid **7** ( $\text{D}_2\text{O}$ , 100 MHz); a) full spectrum and enlarged regions between b) 180.11 and 170.70 ppm, c) 73.26 and 49.91 ppm and d) 36.68-25.92 ppm.



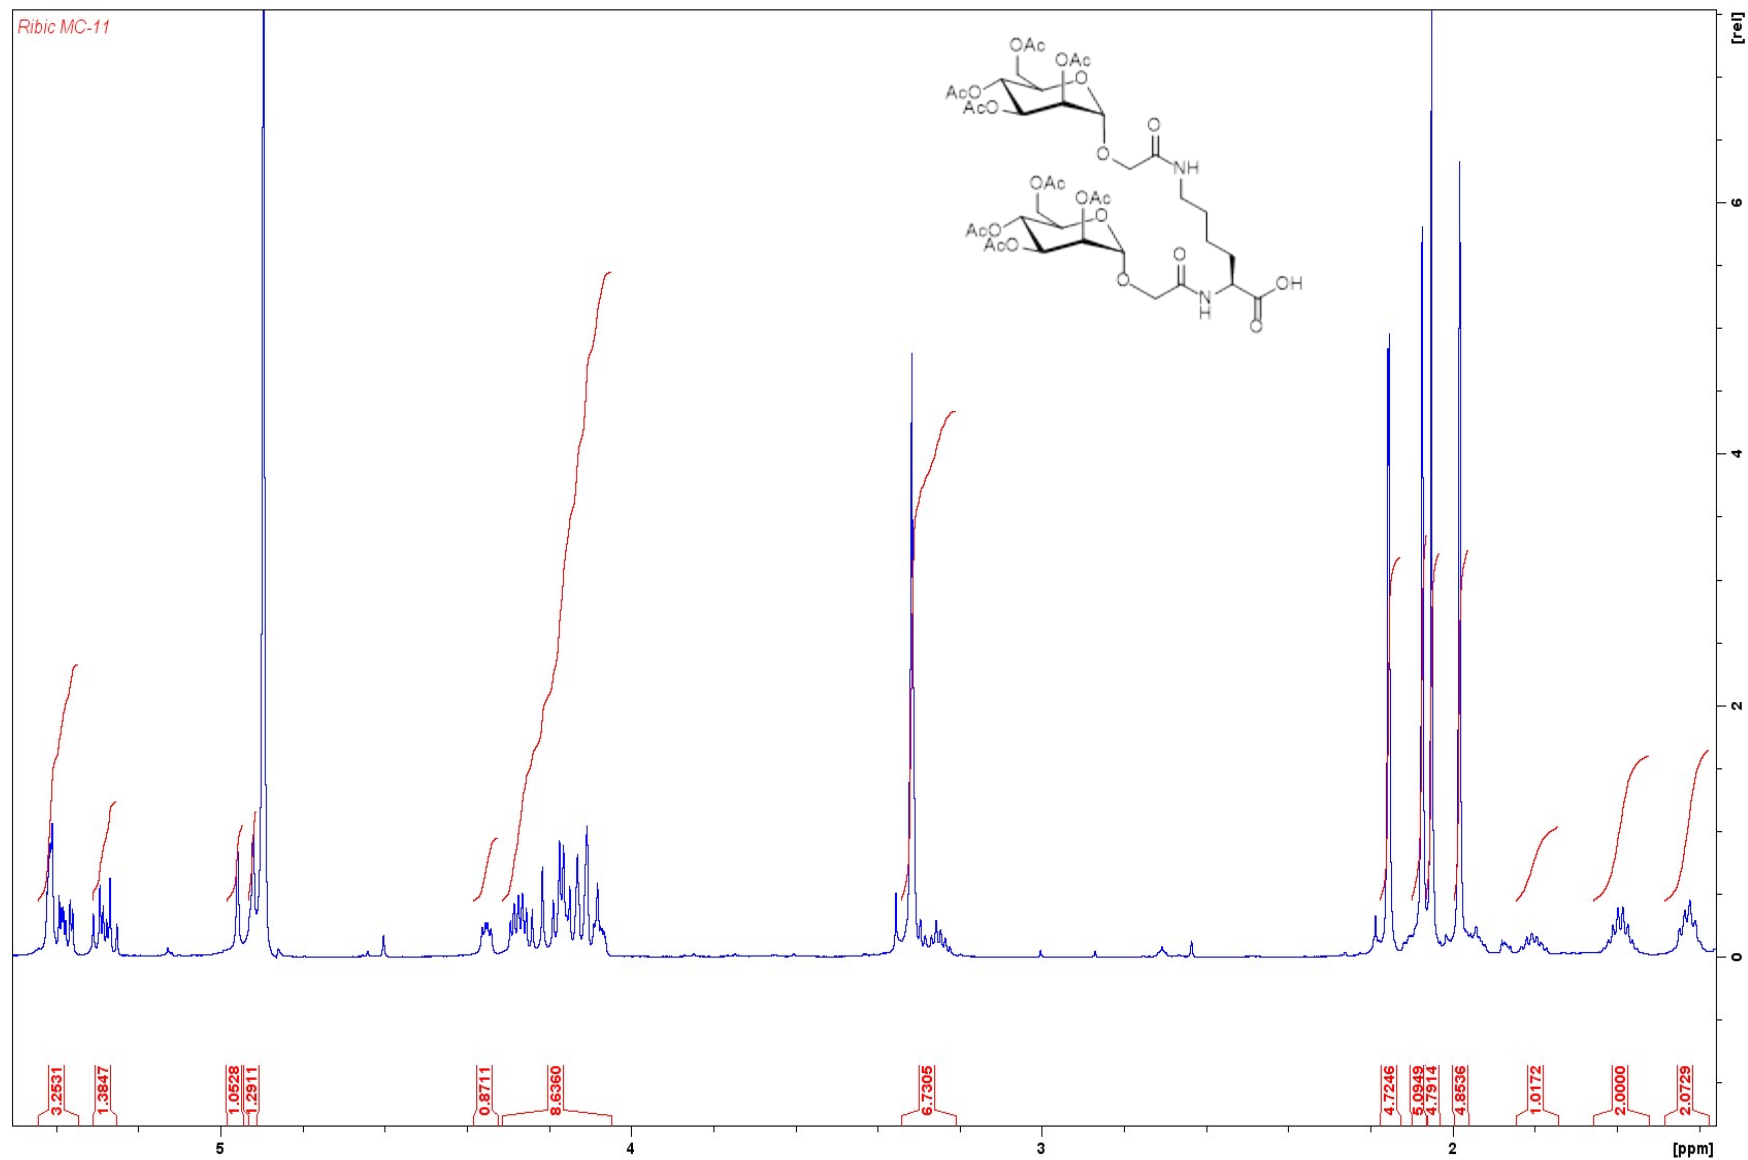

**Figure S10.**  $^1\text{H}$  NMR spectrum of (2S)-2,6-di[2,3,4,6-tetra-O-acetyl- $\alpha$ -D-mannopyranosyloxy]-acetylaminohexanoic acid **9** ( $\text{CD}_3\text{OD}$ , 400 MHz)

a)

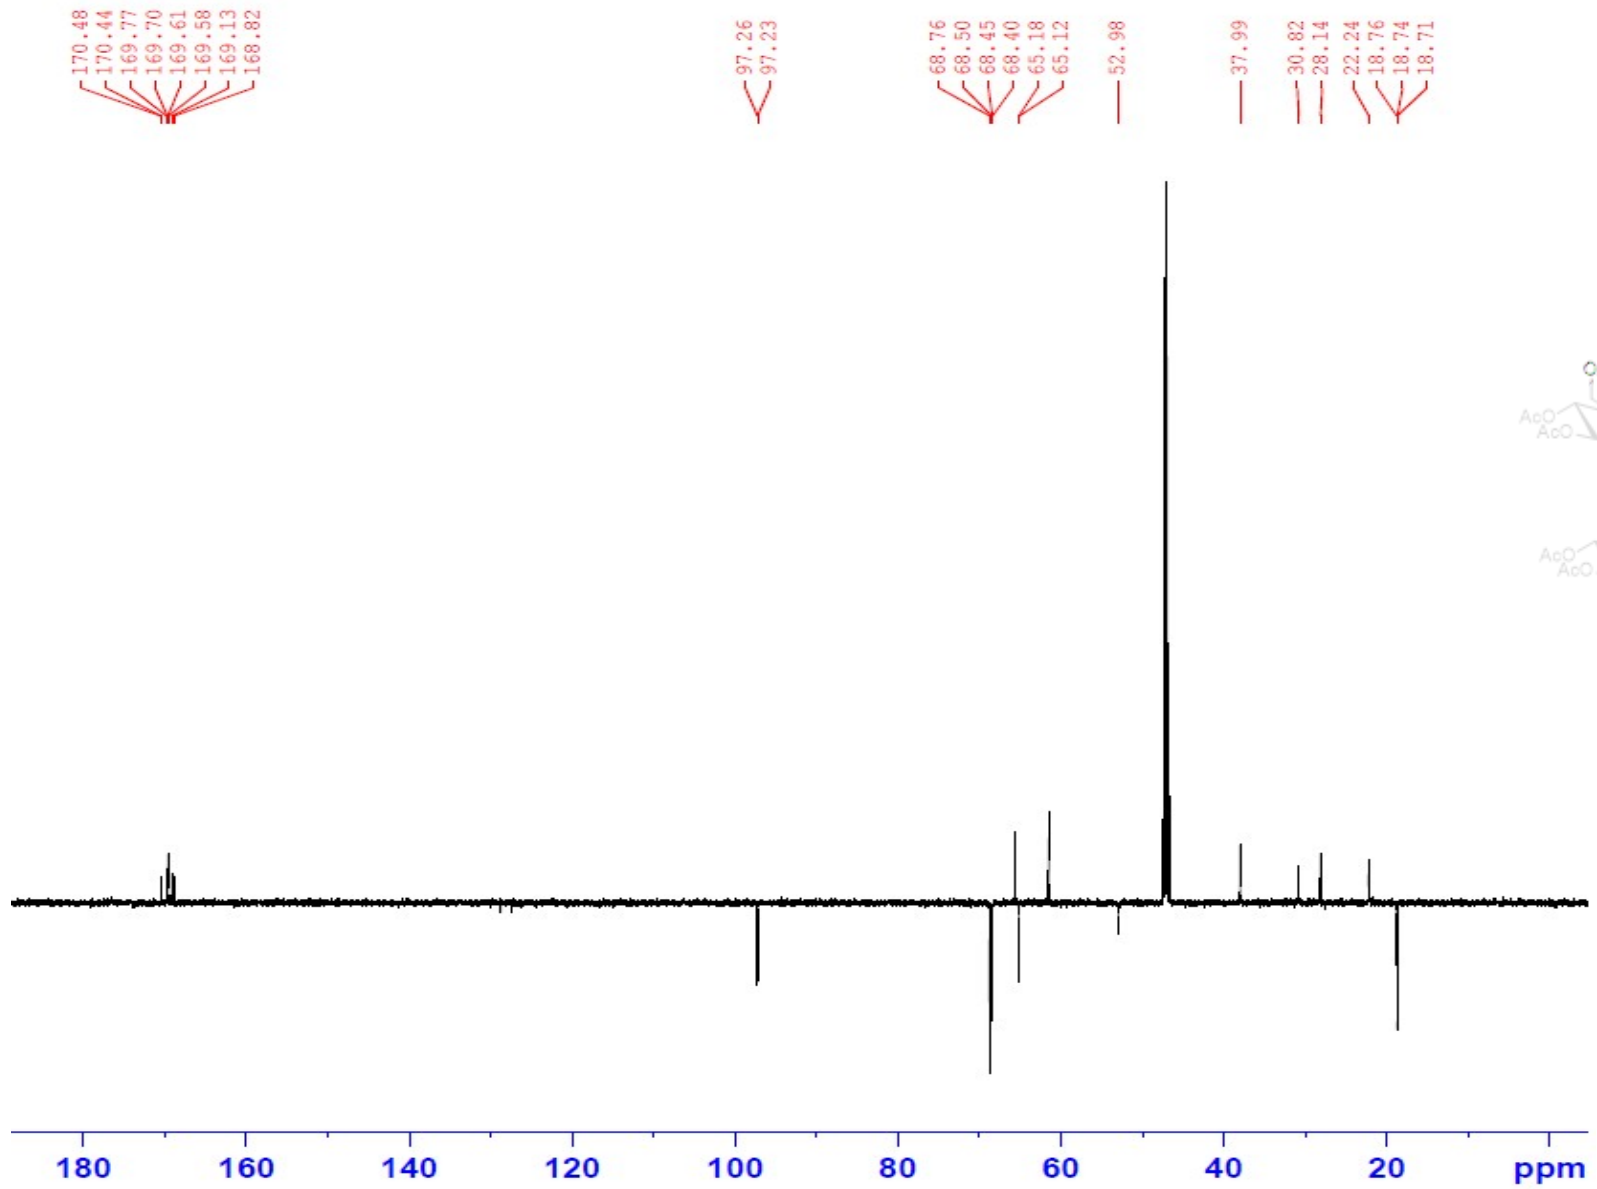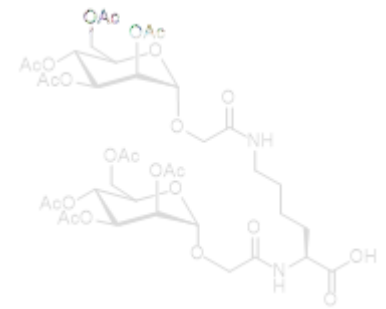

b)

— 170.4805  
— 170.4423

— 169.7665  
— 169.7019  
— 169.6066  
— 169.5848

— 169.1280

— 168.8225

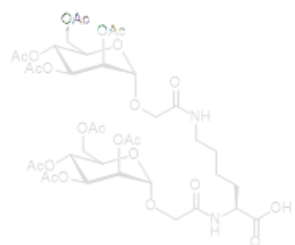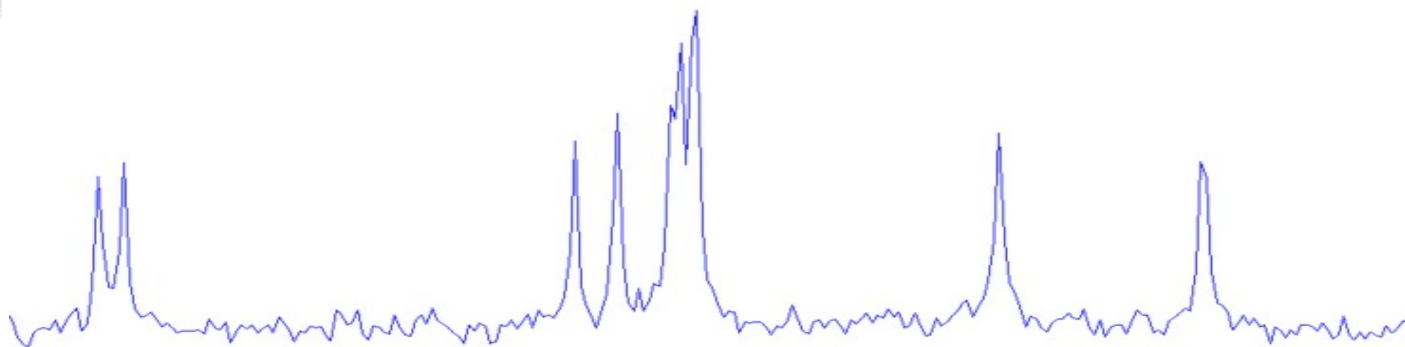

c)

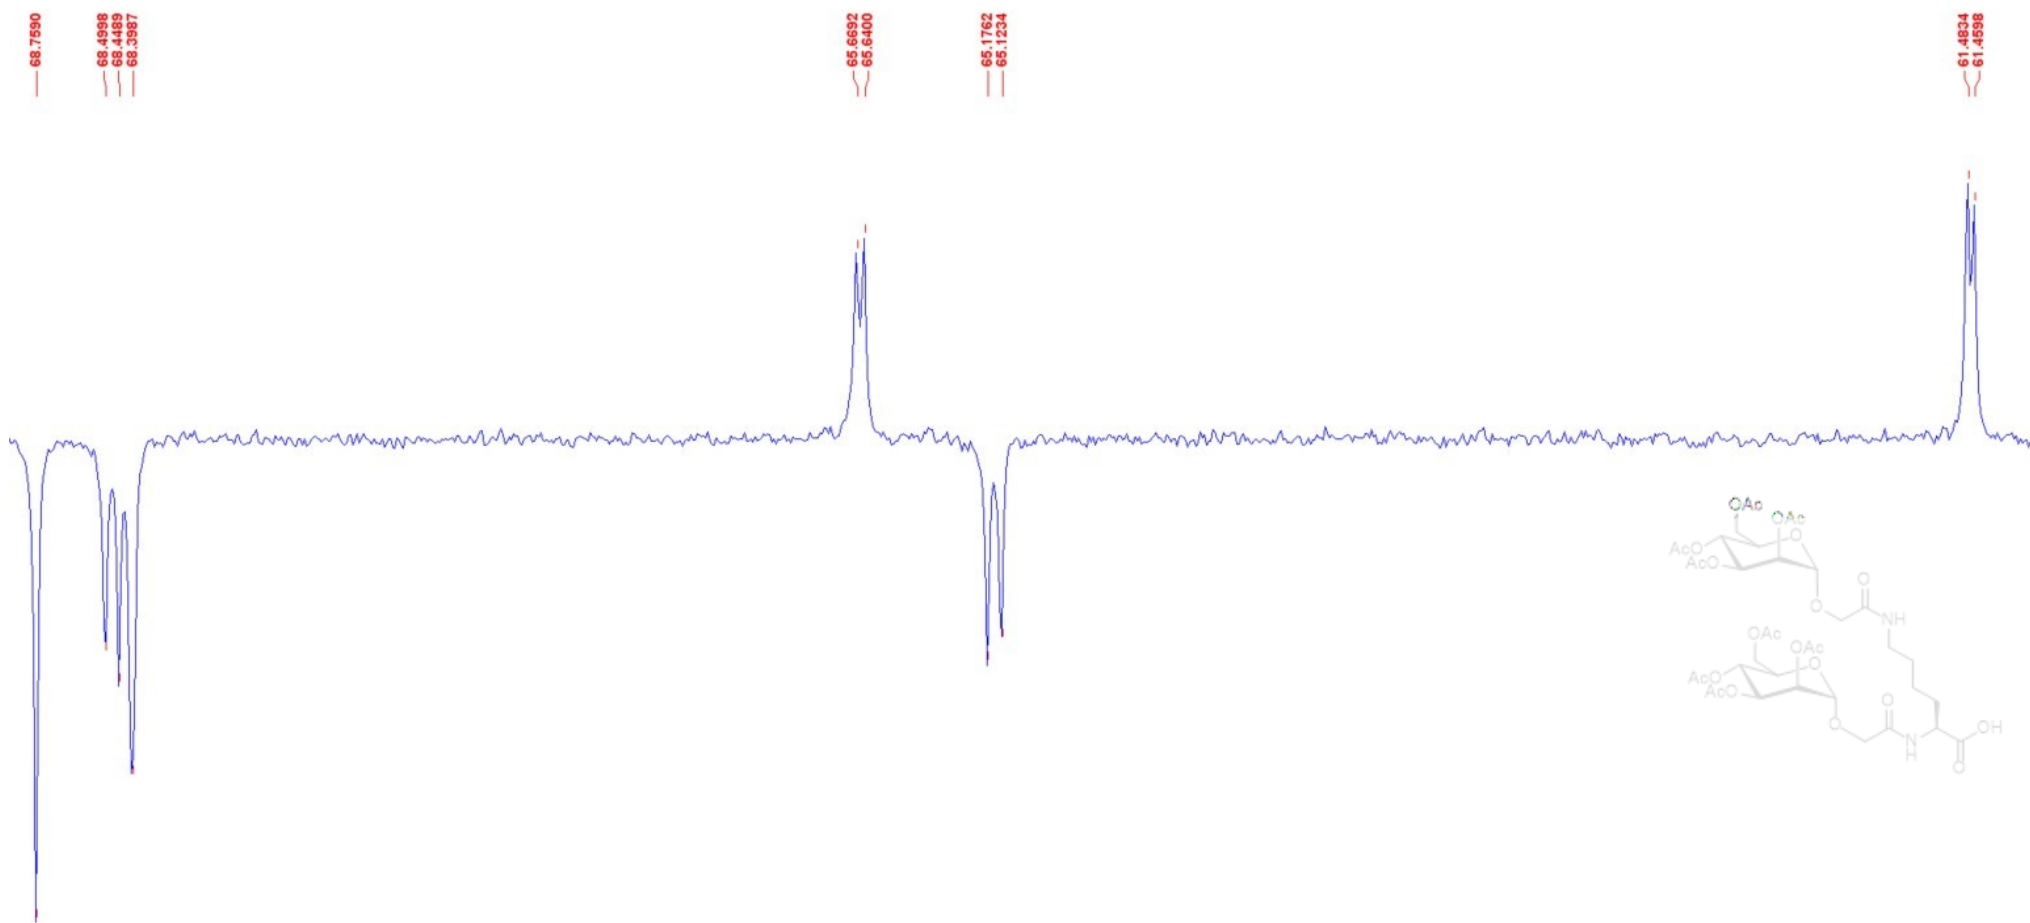

d)

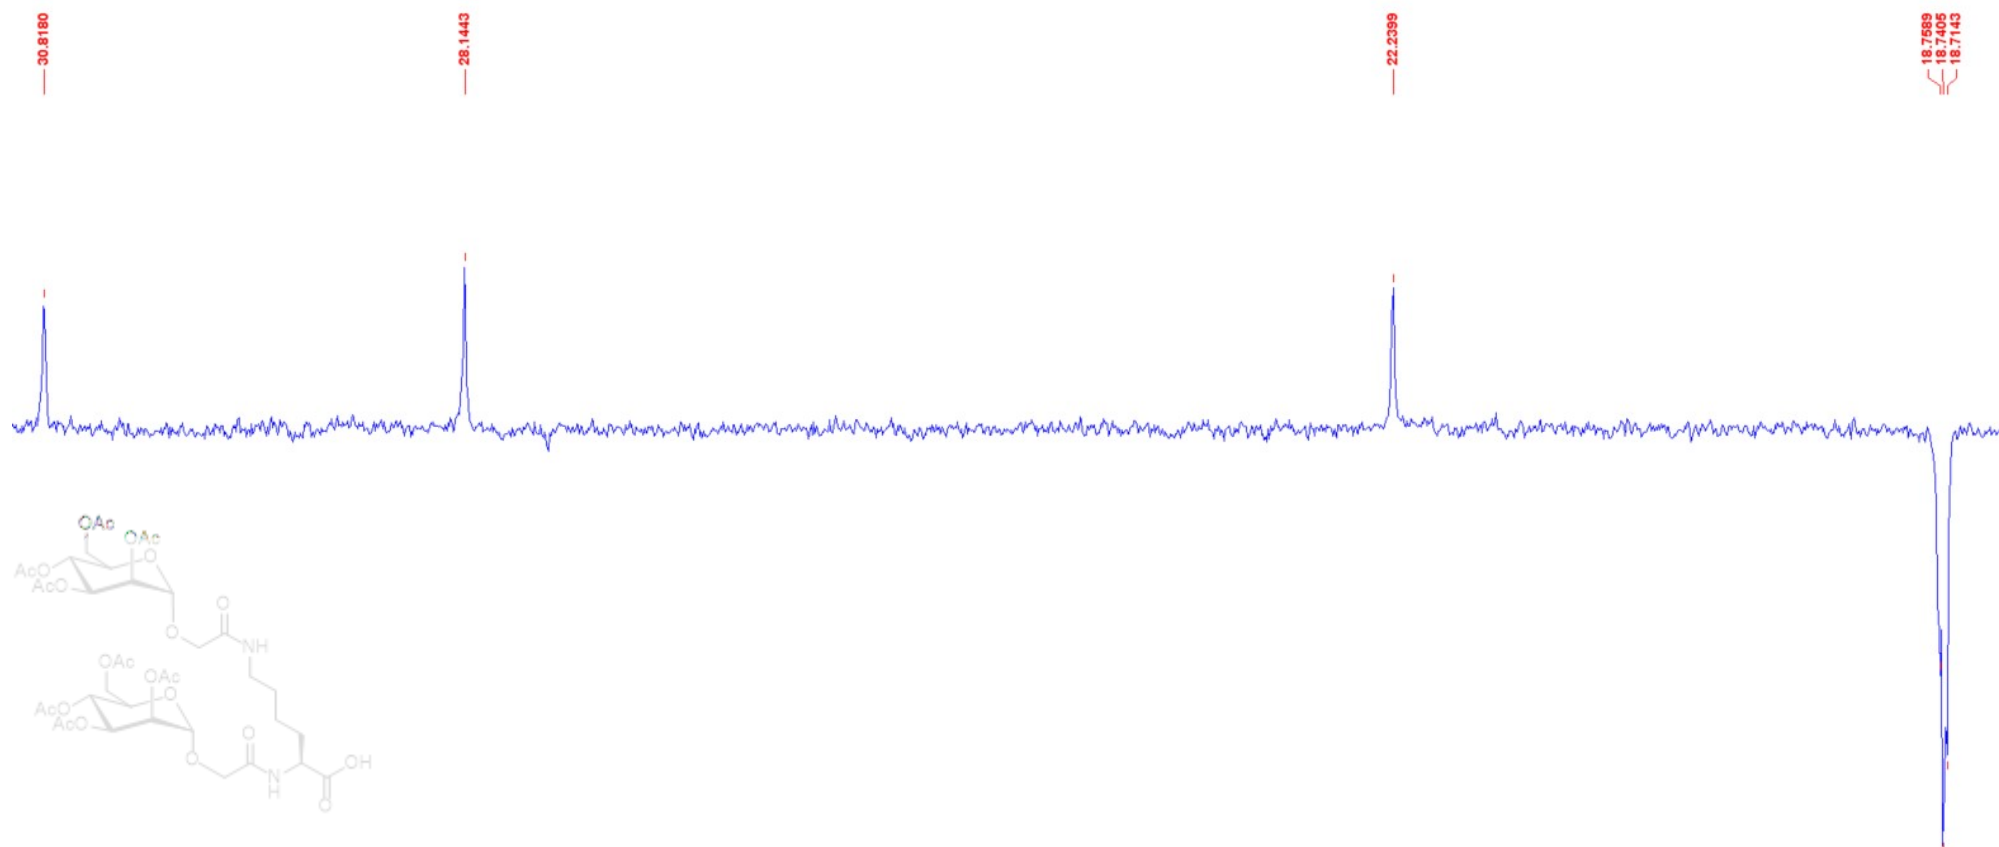

**Figure S11.** <sup>13</sup>C NMR spectrum of (2S)-2,6-di[2,3,4,6-tetra-O-acetyl-α-D-mannopyranosyloxy]-acetylaminohexanoic acid **9** (CD<sub>3</sub>OD, 100 MHz) ; a) full spectrum, and enlarged regions between b) 170.48 and 168.82 ppm, c) 68.76 and 61.46 ppm and d) 30.82-18.71 ppm.

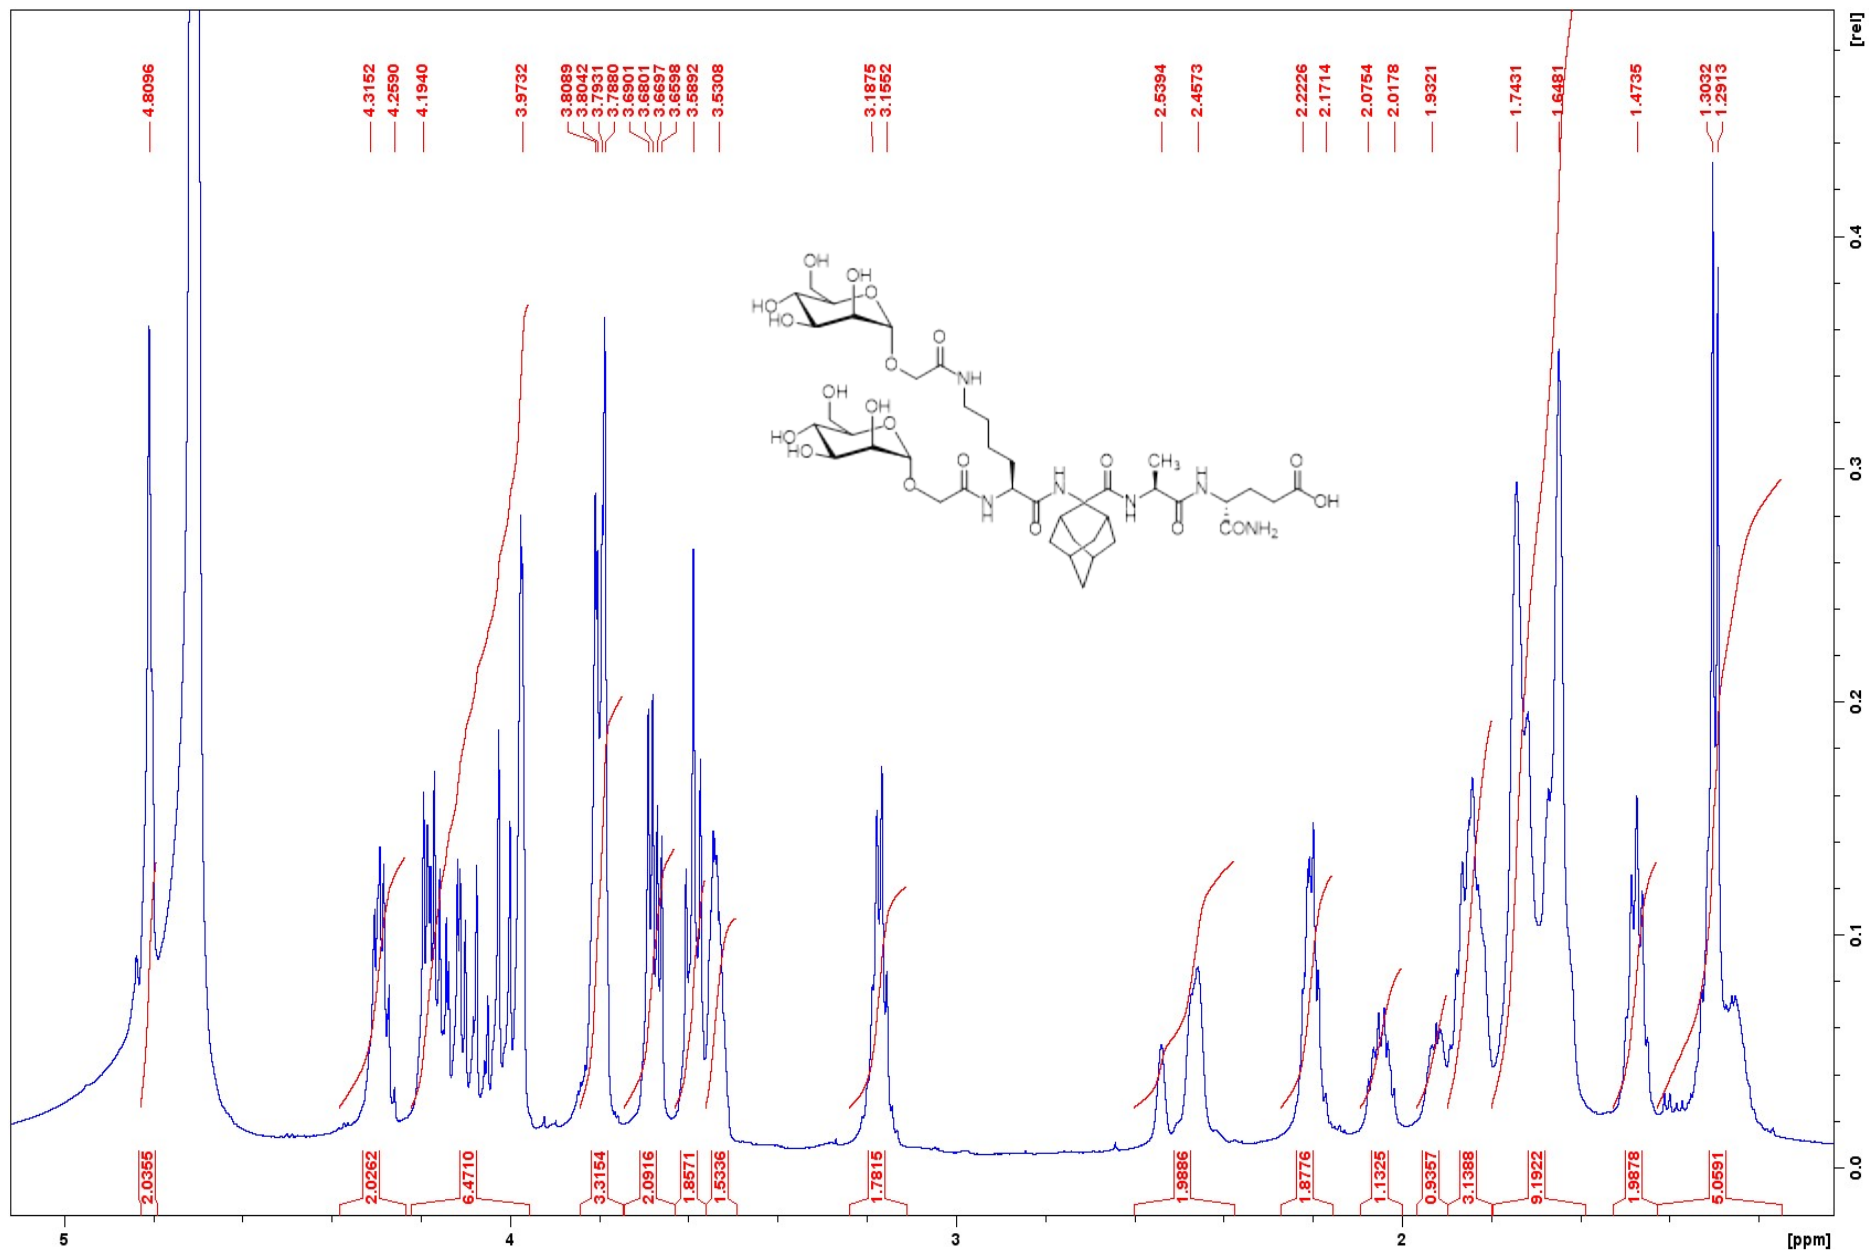

**Figure S12.**  $^1\text{H}$  NMR spectrum of 4-{2-[[[(2S)-2,6-di{2-(2,3,4,6-tetra-O-acetyl- $\alpha$ -D-mannopyranosyloxy)acetamino}hexanoyl]aminoadamantane-2-carbonyl]amino]propionylamino}4-carbamoylbutanoic acid **11** ( $\text{D}_2\text{O}$ , 400 MHz)

a)

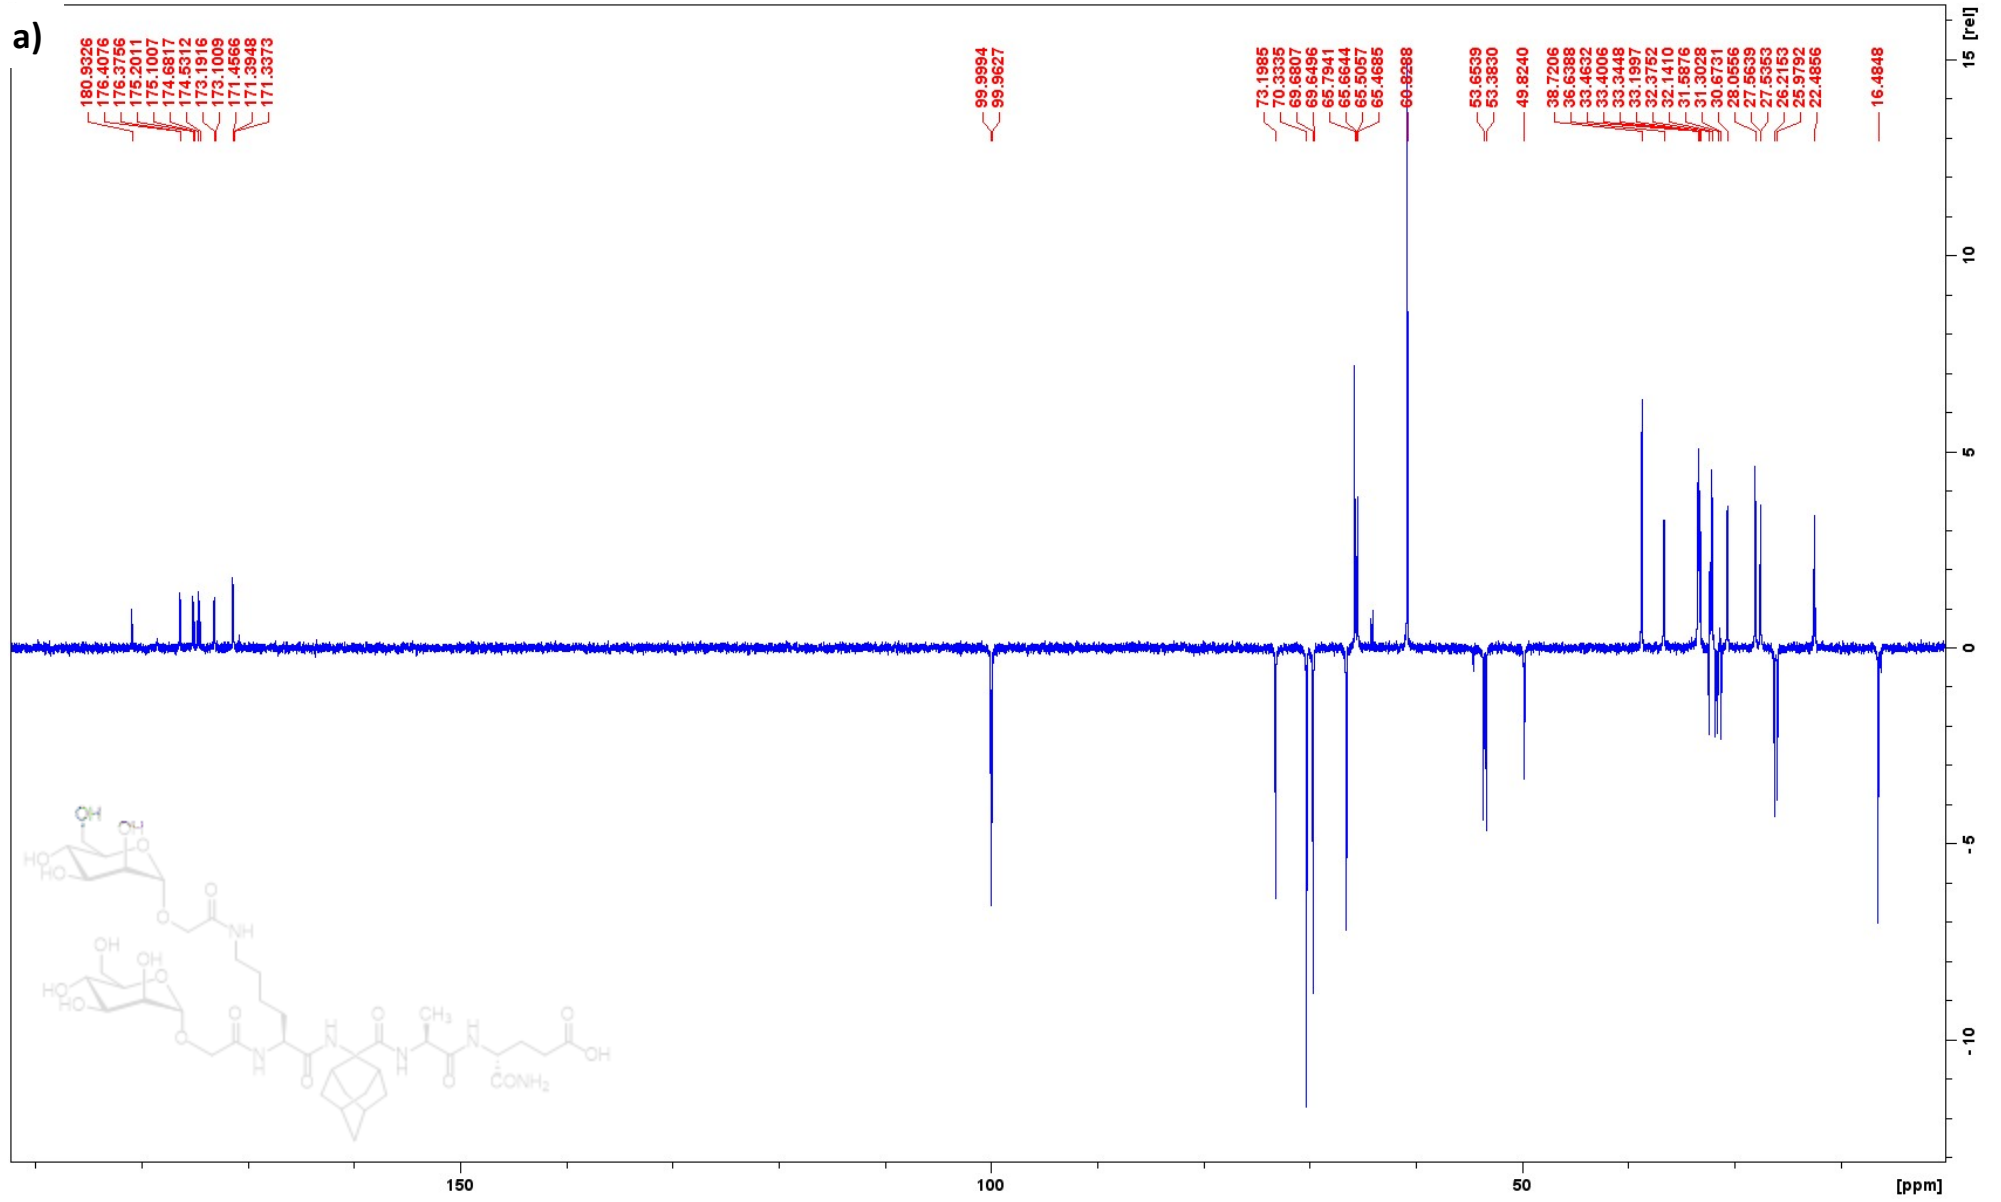

b)

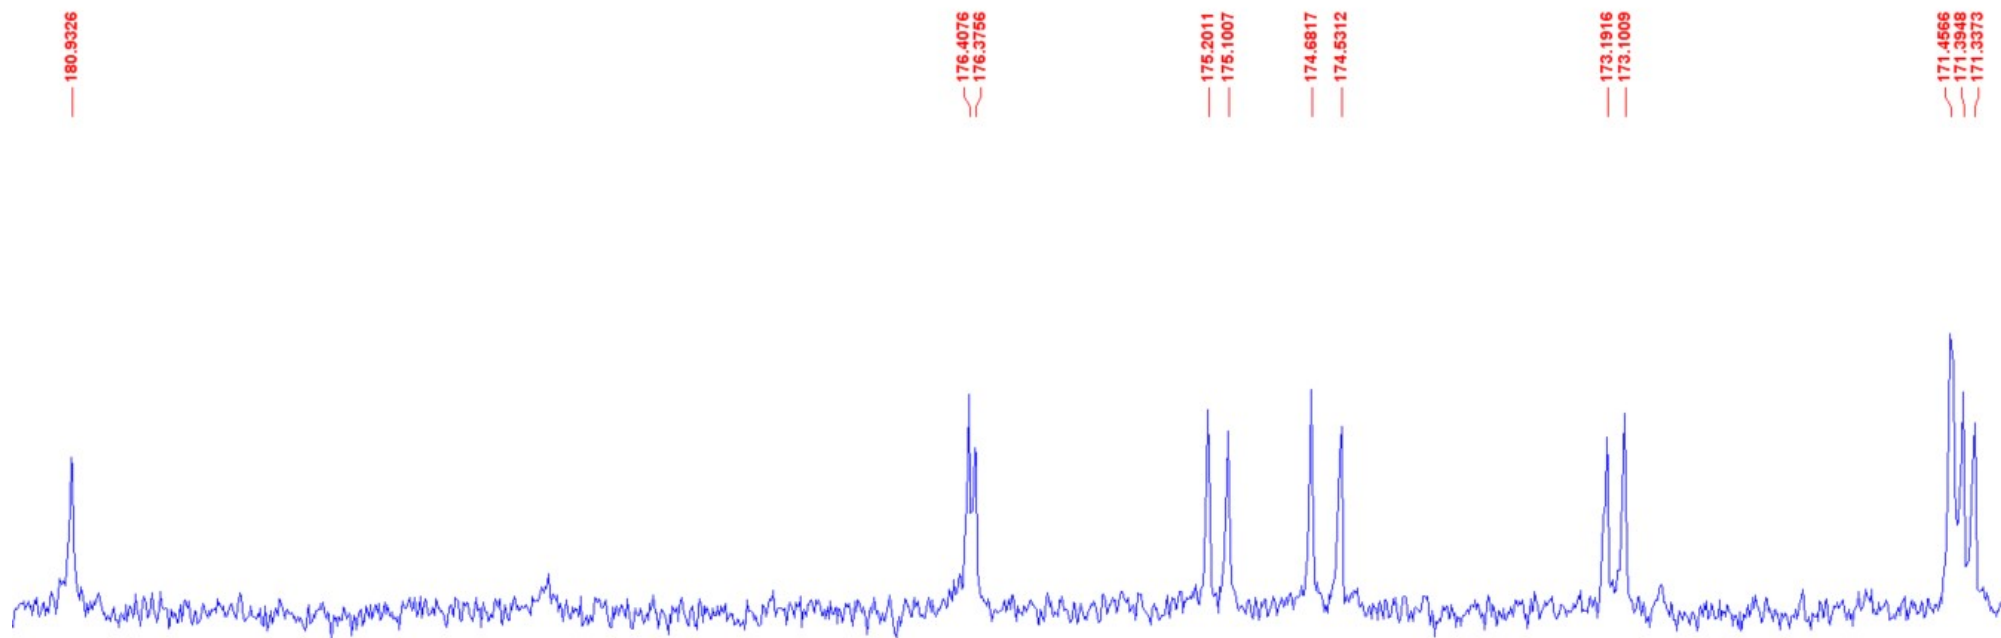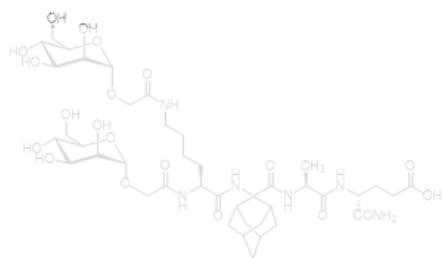



c)

99.9984  
99.9627

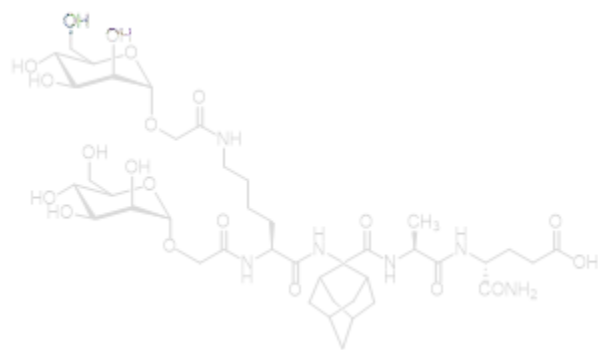

73.1985

70.3335  
69.6807  
69.6496

66.5500  
65.7941  
65.6644  
65.5057  
65.4685

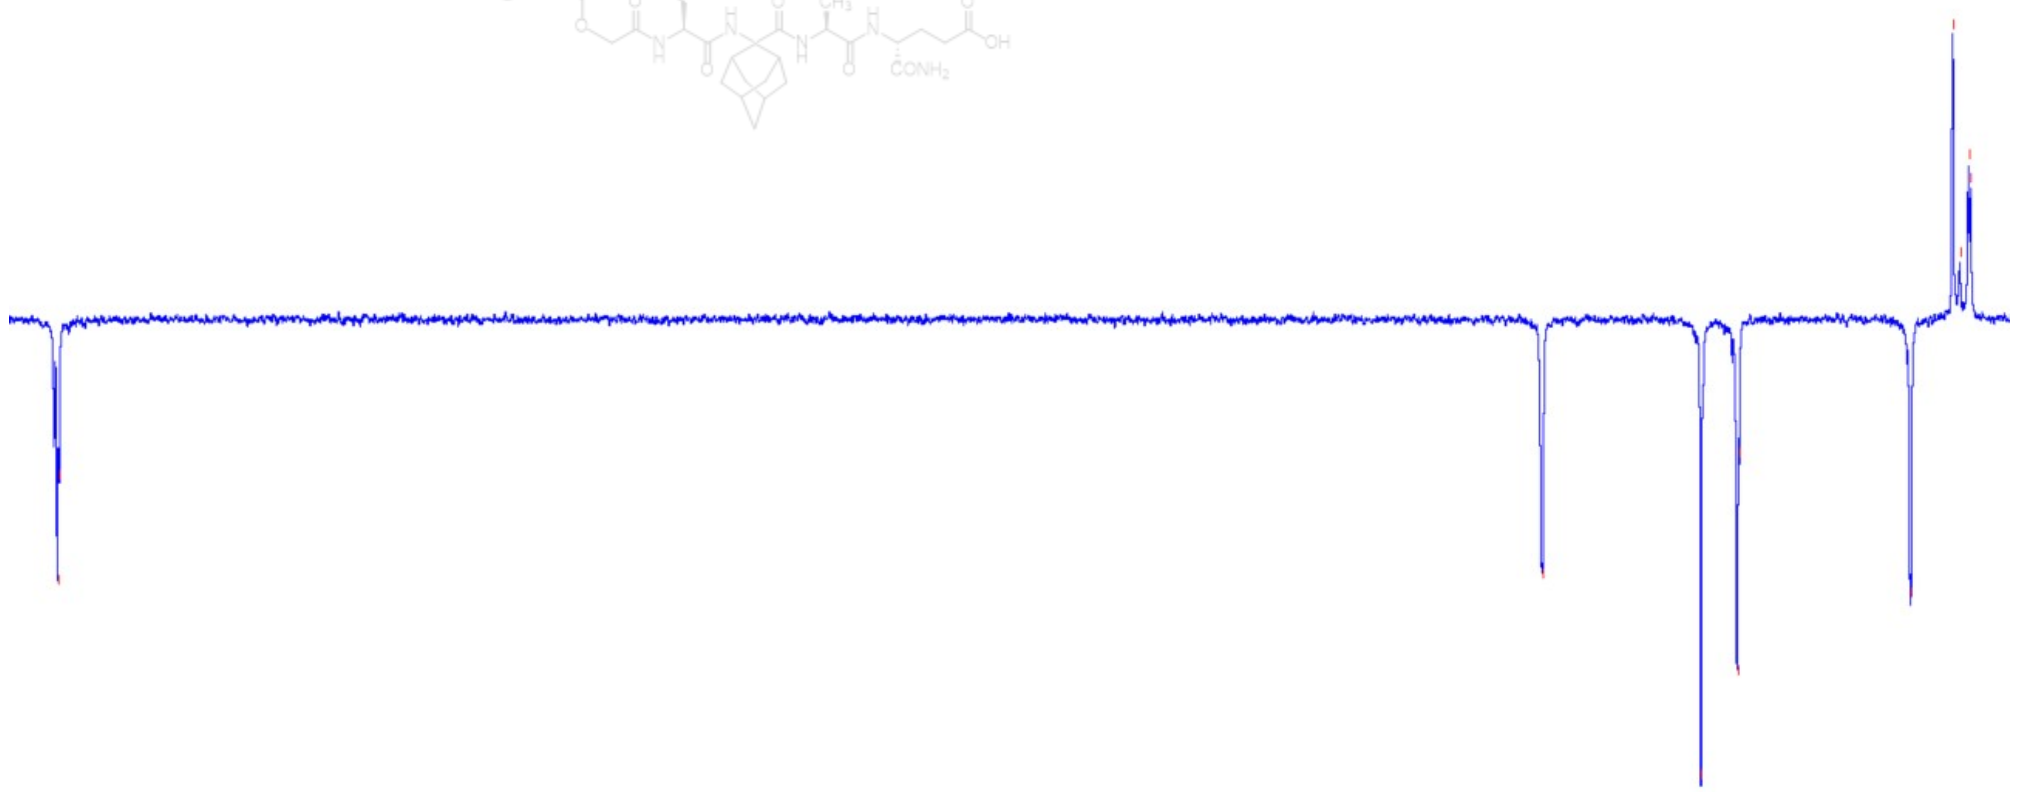

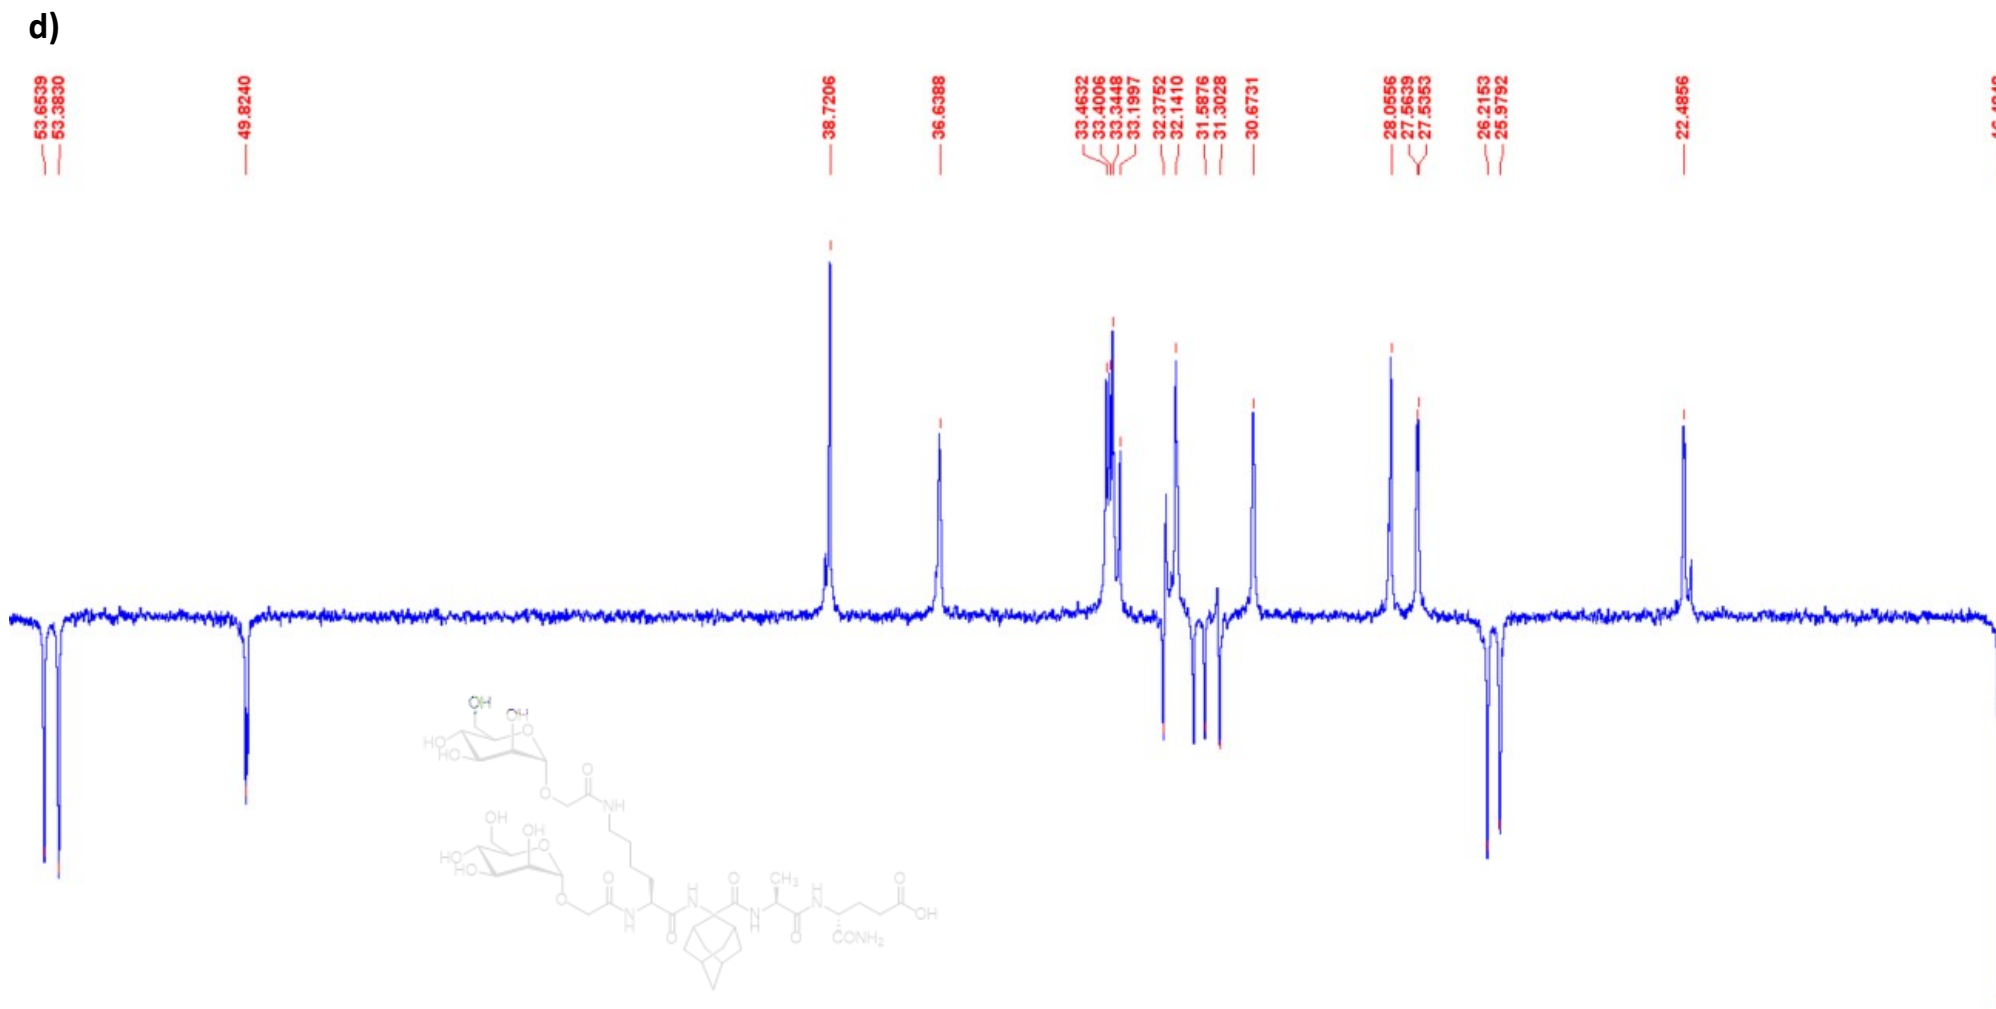

**Figure S13.**  $^{13}\text{C}$  NMR spectrum of 4-{2-[[[(2S)-2,6-di{2-(2,3,4,6-tetra-O-acetyl- $\alpha$ -D-mannopyranosyloxy)acetylamino}hexanoyl]aminoadamantane-2-carbonyl]amino]propionylamino}4-carbamoylbutanoic acid **11** ( $\text{D}_2\text{O}$ , 100 MHz); a) full spectrum and enlarged regions between b) 180.93 and 171.33 ppm, c) 100.00 and 65.47 ppm and d) 53.65-16.48 ppm
