# Supplementary figures and images for: Di-mannosylation enhances the adjuvant properties of adamantane-containing desmuramyl peptides in vivo
Source: Royal Society of Chemistry journal article supplement (doi:10.1039/d4ob00592a), 2024-01-01

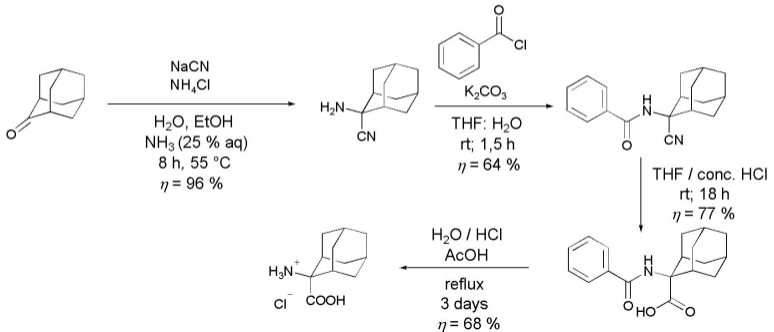

Supplement: d4ob00592a3.pdf [file d4ob00592a3.pdf]
